# Supplementary material
Source: PubMed Central journal article supplement (PMC3808619)
Supplement: 1306262110_pnas.201306262SI.pdf [file 1306262110_pnas.201306262SI.pdf]

# Supporting Information

Zhu et al. 10.1073/pnas.1306262110

## National Institutes of Health Intramural Sequencing Center Comparative Sequencing Program Authors

Jesse Becker, Betty Benjamin, Robert Blakesley, Gerry Bouffard, Shelise Brooks, Holly Coleman, Mila Dekhtyar, Michael Gregory, Xiaobin Guan, Jyoti Gupta, Joel Han, April Hargrove, Shi-ling Ho, Taccara Johnson, Richelle Legaspi, Sean Lovett, Quino Maduro,

Cathy Masiello, Baishali Maskeri, Jenny McDowell, Casandra Montemayor, James Mullikin, Morgan Park, Nancy Riebow, Karen Schandler, Brian Schmidt, Christina Sison, Mal Stantripop, James Thomas, Pam Thomas, Meg Vemulapalli, Alice Young

## Other Supporting Information Files

[SI Appendix \(PDF\)](#)
