# Supplementary material
Source: PubMed Central journal article supplement (PMC3808619)
Supplement: 1306262110_sapp.pdf [file 1306262110_sapp.pdf]

## Supporting Information (SI) Appendix for

### De novo identification of VRC01-class HIV-1 broadly neutralizing antibodies by next-generation sequencing analysis of B cell transcripts

Jiang Zhu<sup>a,1</sup>, Xueling Wu<sup>a,2</sup>, Baoshan Zhang<sup>a</sup>, Krisha McKee<sup>a</sup>, Sijy O'Dell<sup>a</sup>, Cinque Soto<sup>a</sup>,  
Tongqing Zhou<sup>a</sup>, Joseph Casazza<sup>a</sup>, NISC Comparative Sequencing Program<sup>c</sup>, James C.  
Mullikin<sup>c</sup>, Peter D. Kwong<sup>a,3</sup>, John R. Mascola<sup>a,3</sup>, and Lawrence Shapiro<sup>b,3</sup>

<sup>a</sup> Vaccine Research Center and <sup>c</sup>NIH Intramural Sequencing Center, National Human Genome  
Research Institute, National Institutes of Health, Bethesda, Maryland 20892, USA.

<sup>b</sup> Department of Biochemistry and Molecular Biophysics, Columbia University, New York, NY  
10032, USA.

<sup>1</sup>Present address: The Department of Immunology and Microbial Science, The Scripps Research  
Institute, 10550 N Torrey Pines Rd La Jolla, CA 92037

<sup>2</sup>Present address: The Aaron Diamond AIDS Research Center, 455 First Avenue, 7<sup>th</sup> Floor, New  
York, NY 10016, USA.

<sup>3</sup>To whom correspondence should be addressed:

PDK: Phone (301)594-8439; Email- [pdkwong@nih.gov](mailto:pdkwong@nih.gov)

JRM: Phone (301)496-1852; Email- [jmascola@nih.gov](mailto:jmascola@nih.gov)

LS: Phone (212)851-5381; Email- [lss8@columbia.edu](mailto:lss8@columbia.edu)

#### **This Appendix includes:**

Materials and Methods

References

Supplementary Figures 1-6

Supplementary Tables 1-13

Materials and Methods

## Materials and Methods

**Human Specimens.** The sera and peripheral blood mononuclear cells (PBMCs) were obtained from HIV-1 infected donors (**Table S1**) enrolled in investigational review board approved clinical protocols at the National Institute of Allergy and Infectious Diseases. At the time of sampling, all HIV-1 infected donors were off anti-retroviral treatment.

### **Antibodies, Plasmids, Antibody and Protein Expression and Purification.**

Antibody production was similar to what has been described before (1, 2). Briefly, the sequences were selected using the bioinformatics procedures described in the main text and checked for sequencing errors using an automatic error correction procedure (1, 2) (and see below) followed by manual inspection. The corrected antibody sequences were synthesized (GenScript, Inc) and cloned into the CMV/R expression vector containing the constant regions of IgG1 (3). The heavy chains identified from donor C38 antibodyomes by lineage rank and cross-donor phylogenetic analysis were paired with VRC01 light chain DNA for transfection, while C38 light chains identified by signature matching were initially paired with VRC01 heavy chain and then with functional C38 heavy chain DNAs for transfection. Full-length IgGs were expressed from transient transfection of 293F cells and purified using a recombinant protein-A column (Pierce).

**HIV-1 Neutralization and Protein Competition Assays.** Neutralization was measured using HIV-1 Env-pseudoviruses to infect TZM-bl cells as described (4-6). Neutralization curves were fit by nonlinear regression using a 5-parameter hill slope equation as described(5). The 50% inhibitory concentrations ( $IC_{50}$ ) were reported as the antibody concentrations required to inhibit infection by 50%. Competition of serum neutralization (7) was assessed by adding a fixed concentration (25  $\mu$ g/ml) of RSC3 or  $\Delta$ RSC3 to serial dilutions of serum for 15 min prior to the addition of virus. The resulting  $IC_{50}$  values were compared to the control with mock phosphate buffered saline (PBS) added. The neutralization blocking effect of the proteins was calculated as the percent reduction in the  $ID_{50}$  (50% inhibitory dilution) value of the serum in the presence of protein compared to PBS.

**Sample Preparation for 454 Pyrosequencing.** Samples for 454 pyrosequencing were prepared as described (1, 2) with minor modifications. Briefly, mRNA was extracted from 20 million PBMC into 200  $\mu$ l of elution buffer (Oligotex kit, Qiagen), then concentrated to 10-30  $\mu$ l by centrifuging the buffer through a 30 kD micron filter (Millipore). The reverse-transcription was performed in one or multiple 35  $\mu$ l-reactions, each composed of 13  $\mu$ l of mRNA, 3  $\mu$ l of oligo(dT)<sub>12-18</sub> at 0.5  $\mu$ g/ $\mu$ l (Invitrogen), 7  $\mu$ l of 5x first strand buffer (Invitrogen), 3  $\mu$ l of RNase Out (Invitrogen), 3  $\mu$ l of 0.1M DTT (Invitrogen), 3  $\mu$ l of dNTP mix (each at 10 mM), and 3  $\mu$ l of SuperScript II (Invitrogen). The reactions were incubated at 42°C for 2 hours. The cDNAs from each sample were combined, cleaned up and eluted in 20  $\mu$ l of elution buffer (NucleoSpin Extract II kit, Clontech). In this way, 1  $\mu$ l of the cDNA was equivalent of transcripts from 1 million PBMC. The immunoglobulin gene-specific PCRs were set up in a total volume of 50  $\mu$ l, using 5  $\mu$ l of the cDNA as template (equivalent of transcripts from 5 million PBMC). The DNA polymerase systems used were either the Platinum *Taq* High-Fidelity (HiFi) DNA Polymerase system (Invitrogen) or the Phusion HiFi DNA Polymerase system (Finnzymes). According to the instructions of the manufacturer, the reaction mix was composed of water, the appropriate buffer and 1  $\mu$ l of supplied MgSO<sub>4</sub> if required, 2  $\mu$ l of dNTP mix (each at 10 mM), 1-2  $\mu$ l of primers or primer mixes (**Table S2**) at 25  $\mu$ M, and 1  $\mu$ l of DNA polymerase. For IGHV1 amplification, the forward primers were either primer mix of pooled equal parts of four VH1 primers (H1) or seven VH1 primers (G1) published by Scheid et al (8) (**Table S2**). The primers each contained the appropriate adaptor sequences (XLR-A or XLR-B) for subsequent 454 pyrosequencing. For the Platinum *Taq* HiFi polymerase, the PCRs were initiated at 95°C for 30 sec, followed by 25 cycles of 95°C for 30 sec, 58°C for 30 sec, and 72°C for 1 min, followed by 72°C for 10 min. For the Phusion HiFi polymerase, the PCRs were initiated at 98°C for 30 sec, followed by 25 cycles of 98°C for 10 sec, 57°C for 30 sec, and 72°C for 30 sec, followed by 72°C for 10 min. The PCR products at the expected size (~500bp) were gel purified (Qiagen), followed by phenol/chloroform extraction.

**454 Library Preparation and Pyrosequencing.** The 454 pyrosequencing was carried out as described (1, 2). Briefly, PCR products were quantified using Qubit (Life Technologies, Carlsbad, CA). Library concentrations were determined using the KAPA Biosystems qPCR system (Woburn, MA) with 454 standards provided in the KAPA system. 454 pyrosequencing of

the PCR products was performed on a GS FLX sequencing instrument (Roche-454 Life Sciences, Bradford, CT) using the manufacturer's suggested methods and reagents. Initial image collection was performed on the GS FLX instrument and subsequent signal processing, quality filtering, and generation of nucleotide sequence and quality scores were performed on an off-instrument linux cluster using 454 application software (version 2.5.3). The amplicon quality filtering parameters were adjusted based on the manufacturer's recommendations (Roche-454 Life Sciences Application Brief No. 001-2010). Quality scores were assigned to each nucleotide using methodologies incorporated into the 454 application software to convert flowgram intensity values to Phred-based quality scores and as described (9). The quality of each run was assessed by analysis of internal control sequences included in the 454 sequencing reagents. Reports were generated for each region of the PicoTiterPlate (PTP) for both the internal controls and the samples.

### **Bioinformatics Pipeline for Primary Analysis of 454-Pyrosequencing-Determined**

**Antibodyomes.** The general bioinformatics pipeline developed in our previous study (1, 2) has been further revised to take all germline genes (heavy chain,  $\kappa$ - and  $\lambda$ -light chains) into consideration and to calculate parameters required for antibodyome analysis. The current pipeline, termed *Antibodyomics 1.0*, consists of five steps. Given a 454-pyrosequencing-determined antibodyome, each sequence read was (1) reformatted and labeled with a unique index number; (2) assigned to variable (V), diverse (D) (for heavy chain only), and joining (J) gene families and alleles using an in-house implementation of IgBLAST (<http://www.ncbi.nlm.nih.gov/igblast/>), and sequences with E-value  $> 10^{-3}$  for V-gene assignment were rejected; (3) subjected to a template-based error correction scheme where 454 homopolymer errors in V, D (for heavy chains only) and J regions were detected and corrected based on the alignment to respective germline sequence (D or J gene was corrected only when the gene assignment was reliable, indicated by E-value  $< 10^{-3}$ ); (4) compared with a set of template antibody sequences at both nucleotide level and amino-acid level using a global alignment module in CLUSTALW2 (10), which provides the basis for the identity/divergence analysis; (5) subjected to a multiple sequence alignment (MSA)-based scheme to determine the third complementarity-determining region (CDR H3 or L3), which was further compared with a set of template CDR H3 or L3 sequences at nucleotide level, and to determine the sequence

boundary of the variable domain. In this scheme, the multiple alignments of representative germline V genes (truncated before the CDR3 region) and J genes (truncated after the CDR3 region) were pre-calculated and used for determination of variable domain sequences. For example, in heavy chain analysis, a 454-pyrosequencing-derived sequence will be added to the multiple alignment of 52 representative IGHV genes (truncated at the second amino acid after a cysteine near the C-terminus) and 6 representative IGHJ genes (truncated before the WGXXG motif) to determine the CDR H3 region, which lies between the last column of aligned V genes and first column of aligned J regions, as well as the variable domain, which lies between the first column of aligned V genes and last column of aligned J genes. Only full-length variable domain sequences were retained in the final data set for subsequent analysis.

**Lineage assignment and lineage rank analysis of heavy chain antibodyomes.** The lineage rank analysis consisted of two consecutive steps, to identify CDR H3 groups and to determine heavy-chain lineages based on identified CDR H3 groups. An iterative procedure has been developed to identify the largest CDR H3 group in a given antibodyome, which was removed from the antibodyome and the rest of sequences were considered a new antibodyome and subjected to the next iteration of analysis until the resulting CDR H3 group contained no more than 300 sequences. In each iteration, the CDR H3 sequences present in the given antibodyome were compiled into a BLAST database using “makeblastdb” in the NCBI-BLAST package (11), and then each CDR H3 sequence was used to BLAST search against the database, allowing one-nucleotide variation in CDR H3 length (usually caused by 454 sequencing error) and no more than 5-nucleotide difference in CDR H3 alignment. Sequences found using this criterion were defined as a “CDR H3 group”. Sequences in the largest CDR H3 group were extracted from the antibodyome and subjected to a clustering analysis to determine the representative CDR H3. In the second step, multiple CDR H3 groups were merged into one lineage if their CDR H3 sequences were of the same length and shared over 80% amino-acid sequence identity, and if the V gene variation was not increased significantly upon group merging. Of note, the variation here was calculated as averaged nucleotide difference of all sequences in the CDR H3 group from the consensus V gene sequence.

**Cross-donor phylogenetic analysis of donor C38 heavy chain antibodyomes.** A revised procedure was used for the cross-donor phylogenetic analysis, which consists of an iterative analysis based on the neighbor-joining (NJ) method (12) implemented in CLUSTALW2 (10) and a second-step analysis based on the maximum likelihood (ML) method with molecular clock implemented in DNAMLK (<http://evolution.genetics.washington.edu/phylip/doc/promlk.html>) in the PHYLIP package v3.69 (<http://evolution.genetics.washington.edu/phylip.html>).

In the NJ-based analysis, the donor heavy chain variable domain ( $V_H$ ) sequences of IGHV1-2 origin were randomly shuffled and divided into subsets of no more than 5,000 sequences. For each subset, the  $V_H$  sequences of 13 template VRC01-like antibodies – VRC01, VRC02, VRC03, VRC-PG04, VRC-PG04b, VRC-CH30, VRC-CH31, VRC-CH32, 12A12, 12A21, 3BNC60, 3BNC117 and NIH45-46 – and their germline V gene – IGHV1-2\*02 – were added exogenously. A NJ tree was then constructed for each subset using the “Phylogenetic trees” option in CLUSTALW2 (10). The donor sequences clustered in the smallest branch that contains all template VRC01-like antibodies were extracted from each NJ tree and combined into a new data set for the next round of cross-donor NJ analysis. The analysis was repeated until convergence, where all the donor sequences resided within a VRC01-like sub-tree containing all 13 template VRC01-class antibodies and no other sequences resided between this sub-tree and the root, and where further repeat of the analysis did not change the NJ tree. Of note, the use of sequence shuffling has been found to improve the convergence efficiency, and the use of V gene instead of inferred reverted unmutated ancestors of VRC01 (or VRC-PG04) for tree rooting can eliminate potential biases for particular sets of D and J genes.

ML-based analysis was used to confirm the cross-donor dendrogram derived from the NJ-based analysis. Starting from the data set obtained from the last iteration of NJ analysis, the multiple sequence alignment generated by CLUSTALW2 (10) was provided as input to construct a phylogenetic tree using DNAMLK (for DNA Maximum Likelihood program with Molecular Clock) (<http://cmgm.stanford.edu/phylip/dnamlk.html>) in the PHYLIP package v3.69 (<http://evolution.genetics.washington.edu/phylip.html>). The calculation was done with default parameters (empirical base frequencies, a transitions to transversions ratio of 2.0, and an overall base substitution model with A 0.24, C 0.28, G 0.27, T 0.21). The output unrooted tree was

visualized using Dendroscope (13), then ordered to ladderize right and rooted by the IGHV1-2\*02 germline gene. Any sequences outside the ML-defined VRC01-like sub-tree were removed and the remaining sequences were used to construct the final cross-donor dendrogram (**Fig. 3**).

The robustness of cross-donor phylogenetic analysis was examined from three aspects. First, we asked if the cross-donor identification was driven by the high divergence of template antibodies. Our calculations showed that the germline divergence of 191 cross-donor-identified V<sub>H</sub> sequences from the donor C38 G1-primer data set ranged from 19.9 to 35.7%, which overlapped with the divergence of 13 template antibodies. However, they only accounted for 0.4% of IGHV1-2-originated sequences within the same divergence range, suggesting that divergence is not a deterministic factor in the cross-donor analysis. Second, we examined if cross-donor analysis could be applied to sequences originated from other germline genes. To assess this possibility, we performed a similar cross-donor analysis on IGHV1-8, IGHV1-18, IGHV1-46 and IGHV1-69 families. Most analyses converged rapidly after a single iteration with no sequence identified except for 591 sequences from cross-donor analysis of IGHV1-46 family, among which 265 are unique. 3 sequences were selected from the cross-donor dendrogram for experimental validation, however, with no detectable neutralizing activity (**Table S10**). Finally, we tested whether cross-donor identification was restricted by the J genes of template antibodies. Most of the cross-donor-identified heavy chain variable domain sequences from G1-primer data set used JH5 and JH6 genes, with the exception of two sequences clustered with VRC01-03, which shared the IGHJ1\*01 allelic origin, confirming that cross-donor analysis was not restricted to a set of particular J genes or by the J gene usage of template antibodies.

**Sequence-specific motif search of donor C38 light chain antibodyomes.** The CDR L3 sequences were extracted from the light chain antibodyomes after pipeline processing. Two sequence-specific features - a CDR L3 length of 5 amino acids and glutamine (Q) or glutamate (E) at position 96 (Kabat numbering) or position 4 within the CDR L3 sequence - were used to search for VRC01-class antibody light chains. Four  $\kappa$ -chains were identified from the 454-pyrosequencing data set generated from amplification with both  $\kappa$  and  $\lambda$  primers, and nine  $\kappa$ -chains were found from the second data set generated from amplification with  $\kappa$  primers only.

## References

1. Zhu J, *et al.* (2012) Somatic Populations of PGT135-137 HIV-1-Neutralizing Antibodies Identified by 454 Pyrosequencing and Bioinformatics. *Frontiers in microbiology* 3:315-315.
2. Wu X, *et al.* (2011) Focused evolution of HIV-1 neutralizing antibodies revealed by structures and deep sequencing. (Translated from eng) *Science* 333(6049):1593-1602 (in eng).
3. Barouch DH & Nabel GJ (2005) Adenovirus vector-based vaccines for human immunodeficiency virus type 1. *Hum Gene Ther* 16(2):149-156.
4. Li M, *et al.* (2005) Human Immunodeficiency Virus Type 1 env Clones from Acute and Early Subtype B Infections for Standardized Assessments of Vaccine-Elicited Neutralizing Antibodies. *J Virol* 79(16):10108-10125.
5. Seaman MS, *et al.* (2010) Tiered categorization of a diverse panel of HIV-1 Env pseudoviruses for neutralizing antibody assessment. (Translated from Eng) *J Virol* 84(3):1439-1452 (in Eng).
6. Wu X, *et al.* (2009) Mechanism of human immunodeficiency virus type 1 resistance to monoclonal antibody B12 that effectively targets the site of CD4 attachment. (Translated from eng) *J Virol* 83(21):10892-10907 (in eng).
7. Wu X, *et al.* (2010) Rational design of envelope identifies broadly neutralizing human monoclonal antibodies to HIV-1. (Translated from eng) *Science* 329(5993):856-861 (in eng).
8. Scheid JF, *et al.* (2011) Sequence and structural convergence of broad and potent HIV antibodies that mimic CD4 binding. (Translated from eng) *Science* 333(6049):1633-1637 (in eng).
9. Brockman W, *et al.* (2008) Quality scores and SNP detection in sequencing-by-synthesis systems. *Genome Research* 18(5):763-770.
10. Larkin MA, *et al.* (2007) Clustal W and Clustal X version 2.0. (Translated from eng) *Bioinformatics* 23(21):2947-2948 (in eng).
11. Altschul SF, Gish W, Miller W, Myers EW, & Lipman DJ (1990) BASIC LOCAL ALIGNMENT SEARCH TOOL. *Journal of molecular biology* 215(3):403-410.
12. Kuhner MK & Felsenstein J (1994) A simulation comparison of phylogeny algorithms under equal and unequal evolutionary rates. (Translated from eng) *Mol Biol Evol* 11(3):459-468 (in eng).
13. Huson DH, *et al.* (2007) Dendroscope: An interactive viewer for large phylogenetic trees. *BMC Bioinformatics* 8:460.



```

Heavy chain -----FR1----- CDR1 -----FR2----- CDR2 -----FR3----- CDR3 -----FR4-----
IGHV1-2*02 QVQLVQSGAEVKKPGASVKVSCKASGYFTFG.....YYMHWVRQAPGQGLEWMGWINPNSGGTNY.AQKFQGRVT.MTR.....DTSISTAYMELSLRSLSDTAVYYCAR.....

Template VRC01-class heavy chains:
VRC01 H QVQLVQSGGQMKKPGESMRISCRASGYEFID.....CTLNWIRLAPGKRPEWNGWLKPRGGAVNY.ARPLQGRVT.MTR.....DVYSDTAFLELRSLTVDDTAVYFCTRGKNCD...YNWDFEHWGRGTPVIVSS
VRC02 H QVQLVQSGGQMKKPGESMRISCQASGYEFID.....CTLNWVRLAPGRREPEWNGWLKPRGGAVNY.ARPLQGRVT.MTR.....DVYSDTAFLELRSLTADDTAVYYCTRGKNCD...YNWDFEHWGRGTPVTVSS
VRC03 H QVQLVQSGAVITPGSSVKISCRASGYNFRD.....YLIHWVRLIPDKGFEWIGWIKPLWGAVY.ARQLQGRVS.MTRQLSQDDDPDWGVAYMEFSGLTPADTAEYFCVRRGSCD...YCGDFPWQYWGQGTVVVVSS
VRC-PG04 H QVQLVQSGSGVKKPGASVRVSCWTSEDIFER.....TELIHWVRQAPGQGLEWIGWVKTVTGAVNFGSPDFRGRVS.LTR.....DRDLFTAHMDIRGLTQGDTATYFCARQKFYTGG...QGWFFDLWGRGTLIVVSS
VRC-PG04b H QVQLVQSGSGVKKPGASVRVSCWTSEDIFER.....TELIHWVRQAPGQGLEWIGWVKTVTGAVNFGSPDFRGRVS.LTR.....DRDLFTAHMDIRGLTQGDTATYFCARQKFYTGG...QGWFFDLWGRGTLIVVSS
VRC-CH30 H QVQLVQSGAAVRKPGASVTVSCKFAEDDDYSPHWVNPAPEHYIHFLRQAPGQLEWLAWMNPTNGAVNY.AWQLHGRLT.ATR.....DGSMTAFLEVRSLRSDDTAVYYCARAQKRGR...SEWAYAHWGQGTPVAVSS
VRC-CH31 H QVQLVQSGAAVRKPGASVTVSCKFAEDDDYSPYVNPAPEHYIHFLRQAPGQLEWLAWMNPTNGAVNY.AWYLNGRVT.ATR.....DRSMTAFLEVKSLRSDDTAVYYCARAQKRGR...SEWAYAHWGQGTPVVVSS
VRC-CH32 H QVQLVQSGAAVRKPGASVTVSCKFAEDDDYSPHWVNPAPEHYIHFLRQAPGQLEWLAWMKPTNGAVNY.AWQLQGRVT.VTR.....DRSQTTAFLEVKNLRSDDTAVYYCARAQKRGR...SEWAYAHWGQGTPVVISA
3BNC60 H QVHLSQSGAAVTKPGASVRVSCEASGYKISD.....HFIHWVRQAPGQGLQVGVINPKTGPNN.PRQFQGRVS.LTR.....QASWDFDTYSFYMDLKAVRSDDTAVYFCARQRS...DFWDFVWGSQGTQVTVSS
3BNC117 H QVQLLQSGAAVTKPGASVRVSCEASGYNIRD.....YFIHWVRQAPGQGLQVGVINPKTGPNN.PRQFQGRVS.LTR.....HASWDFDTFSFYMDLKAVRSDDTAVYFCARQRS...DYWDFVWGSQGTQVTVSS
12A12 H SQHLVQSGTQVKKPGASVRVSCQASGYSTFD.....YVLHWVRQAPGQGLEWNGWIKPVYGAVNY.ARRFQGRIN.FDR.....DIYREIAFMDLSGLRSDDTALYFCARDESGDDT...SWHLHPWGQGTLVIVSA
12A21 H SQHLVQSGTQVKKPGASVRVSCQASGYTFTN.....YILHWVRQAPGQGLEWNGWIKPVYGAVNY.ARQFQGRIQ.LTR.....DIYREIAFMDLSGLRSDDTAVYYCARDESGDDL...KWHLHPWGQGTQVIVSP
NIH45-46 H QVRLSQSGGQMKKPGESMRISCRASGYEFLN.....CPINWIRLAPGRREPEWNGWLKPRGGAVNY.ARKFQGRVT.MTR.....DVYSDTAFLELRSLTSDTAVYFCTRGKYCTARDYYNWDFEHWGRGAPTVSS

```

**Fig. S1.** Sequence alignment of 13 template VRC01-class antibody heavy chain variable domain (VH) sequences. The sequence of inferred germline gene, IGHV1-2\*02, is used as reference in alignment. Amino acids in their V genes that differ from IGHV1-2\*02 are highlighted in red.

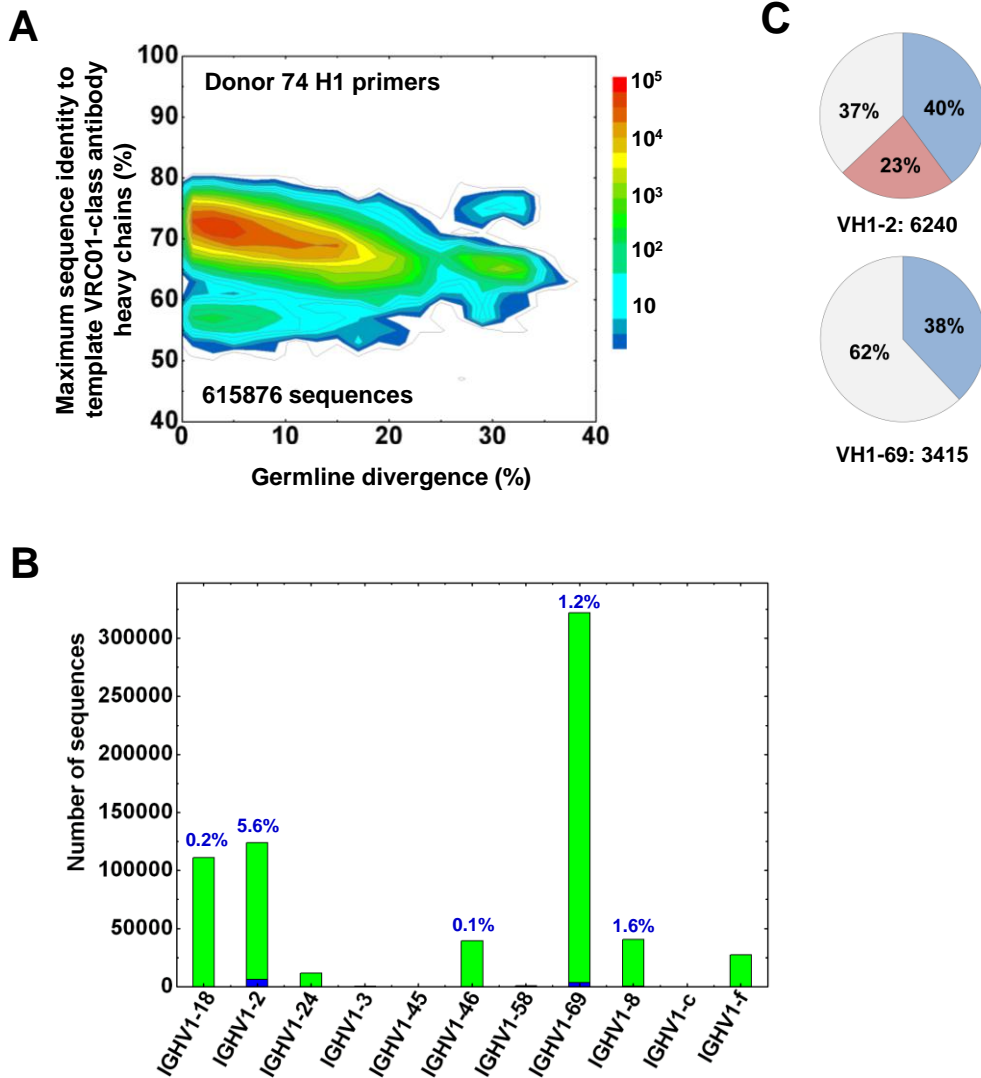

**Fig. S2.** Analysis of the repertoire of heavy chain sequences from donor 74 (2008 sample) generated with H1 primers. (A) Heavy chain sequences are plotted as a function of maximal sequence identity to the heavy chains of all template VRC01-class antibodies except VRC-PG04 and 04b, which were isolated from donor 74, and of sequence divergence from inferred germline genes. Color coding indicates the number of sequences; (B) The distribution of heavy chain sequences from VH1 germline families (in green) and sequences with a divergence of 20% or greater (in blue, percentage labeled for VH1-18, VH1-2, VH-46, VH1-69 and VH1-8 families); (C) Lineage rank analysis of divergent heavy chain sequences (>20%) from VH1-2 and VH1-69 families (other VH1 families do not have lineages with more than 1000 sequences). Note that the two VH1-2 lineages correspond to the broadly neutralizing VRC-PG04-like antibodies designated classes 7 and 8 in our earlier paper<sup>20</sup>.

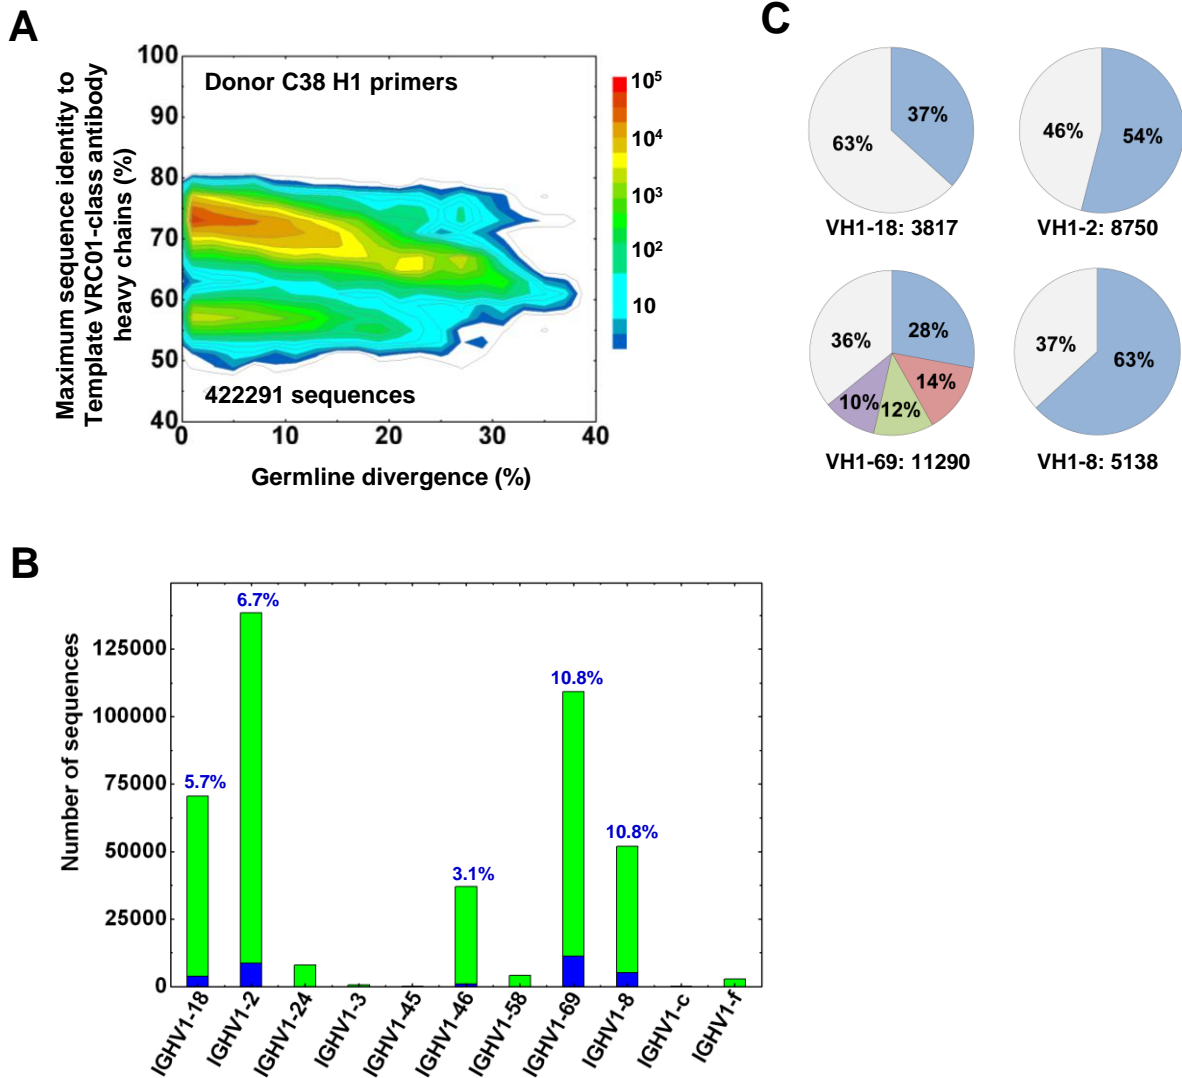

**Fig. S3.** Analysis of the repertoire of heavy chain sequences from donor C38 (2008 sample) generated with H1 primers. (A) Heavy chain sequences are plotted as a function of maximal sequence identity to the heavy chains of 13 template VRC01-class antibodies and of sequence divergence from putative germline genes. Color coding indicates the number of sequences; (B) The distribution of heavy chain sequences from VH1 germline families (in green) and sequences with a divergence of 20% or greater (in blue, percentage labeled for VH1-18, VH1-2, VH1-46, VH1-69 and VH1-8 families); (C) Lineage rank analysis of divergent heavy chain sequences (>20%) from VH1-18, VH1-2, VH1-69 and VH1-8 families (VH1-46 does not have lineages with more than 1000 sequences).

**A** Maximum-likelihood tree of 10 C38 heavy chains

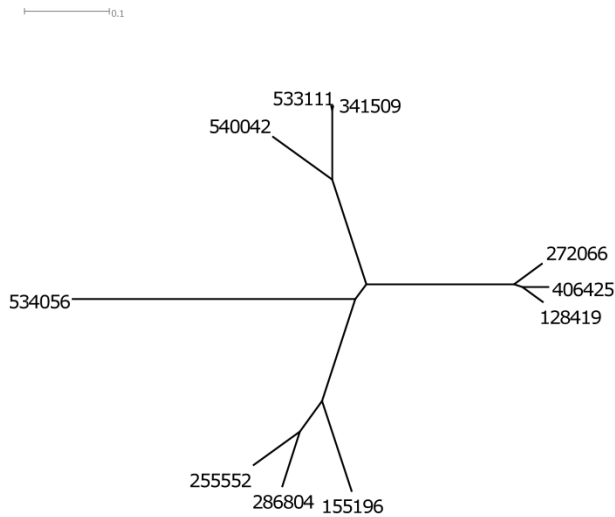

**B** Germline gene family analysis of 10 functional C38 heavy chains.

| Seq ID | Donor | IGHV   | IGHD    | IGHJ | IMGT CDRH3 length (amino acids) |
|--------|-------|--------|---------|------|---------------------------------|
| 534056 | C38   | 1-2*02 | 2-21*01 | 1*01 | 18                              |
| 255552 | C38   | 1-2*02 | 2-21*02 | 5*02 | 12                              |
| 286804 | C38   | 1-2*02 | 2-21*02 | 5*02 | 12                              |
| 155196 | C38   | 1-2*02 | 2-21*02 | 5*02 | 12                              |
| 128419 | C38   | 1-2*02 | 7-27*01 | 5*02 | 12                              |
| 406425 | C38   | 1-2*02 | 7-27*01 | 5*02 | 12                              |
| 272066 | C38   | 1-2*02 | 7-27*01 | 5*02 | 12                              |
| 540042 | C38   | 1-2*02 | 5-24*01 | 5*02 | 11                              |
| 533111 | C38   | 1-2*02 | 5-24*01 | 5*02 | 11                              |
| 341509 | C38   | 1-2*02 | 5-24*01 | 5*02 | 11                              |

**Fig. S4.** Phylogenetic analysis and V(D)J gene family analysis of 10 neutralizing heavy chain sequences identified from C38 by cross-donor phylogenetic analysis. (A) Maximum likelihood (ML) tree of 10 sequences rooted at IGHV1-2\*02 for visualization. The tree revealed 4 major branches, indicating 4 distinct maturation patterns in the V-gene. (B) The V(D)J usage of 10 sequences inferred using a combination of IMGT ([http://www.imgt.org/IMGT\\_vquest/share/textes/](http://www.imgt.org/IMGT_vquest/share/textes/)), IgBLAST (<http://www.ncbi.nlm.nih.gov/igblast/>) and JoinSolver (<http://joinsolver.niaid.nih.gov/>), supporting 4 distinct lineages, which are consistent with the DNAML tree. The correspondence between sequence indexes and names (gVRC-H1-10<sub>dC38</sub>) for these 10 heavy chains can be found in **Fig. 3**.

**A**

```

IGHV1-2*02_
GCG AGA GA
A R
A GCA TAT TGT GGT GGT GAT TGC TAT TCC
A Y C G G D G Y S
534056 GCC ATG AGA GAT TAT TGT CGT GAT GAT AAT TGT AAT AGA TGG GAC CTC GGT CAC TGG GGC CAG GGC AGC CTC ATC GTC GTC TCC GCG
A M R D Y C R D D N C N R W D L G H W G Q G S L I V V S A

IGHJ1*01
GCT GAA TAC TTC CAG CAC TGG GGC CAG GGC ACC CTG GTC ACC GTC TCC TCA
A E Y F Q H W G Q G T L V T V S S

IGHJ2*01
E TAC TGG TAC TTC GAT CTC TGG GGC CGT GGC ACC CTG GTC ACT GTC TCC TCA
Y W Y F D L W G R G T L V T V S S
534056 GCC ATG AGA GAT TAT TGT CGT GAT GAT AAT TGT AAT AGA TGG GAC CTC GGT CAC TGG GGC CAG GGC AGC CTC ATC GTC GTC TCC GCG
A M R D Y C R D D N C N R W D L G H W G Q G S L I V V S A

IGHJ5*02
AC AAC TGG TTC GAC CCC TGG GGC CAG GGA ACC CTG GTC ACC GTC TCC TCA
N W F D P W G Q G T L V T V S S
534056 GCC ATG AGA GAT TAT TGT CGT GAT GAT AAT TGT AAT AGA TGG GAC CTC GGT CAC TGG GGC CAG GGC AGC CTC ATC GTC GTC TCC GCG
A M R D Y C R D D N C N R W D L G H W G Q G S L I V V S A

```

**Fig. S5.** CDR H3 analysis of 10 454-pyrosequencing-identified neutralizing heavy chain sequences from donor C38. (A) CDR H3 analysis of gVRC-H2<sub>dC38</sub> with a sequence index of 534056. The nucleotide and amino acid sequences of the CDR H3 and J region of the heavy chain sequence 534056 were aligned to the putative V, D and J germline genes. Putative nucleotide excisions are indicated with strikethrough lines. In blue are the putative TdT N additions in V-D and D-J junctions. In red are mutations from the putative germline genes and the TdT N additions. Two alternative but unfavorable J genes (IGHJ2\*01 and IGHJ5\*02) are also indicated.

**B**

```

IGHV1-2*02                                IGHJ5*02
GCG AGA GA                                AC AAC TGG TTC GAC CCC TGG GGC CAG GGA ACC CTG GTC ACC GTC TCC TCA
A R IGHD2-21*02 N W F D P W G Q G T L V T V S S
A GCA TAT TGT GGT GGT GAC TGC TAT TCC
A Y E G G D E Y S
255552 GCG AGA GGA TTT GGG GGT TCT GAC TGG AGT TTC CTG TGG GGT CAG GGA ACC CTC ATA ATA GTC TCG TCT
A R G F G G S D W S F L W G Q G T L I I V S S
286804 GCG AGA GGA TTT GGG GGT TCT GAC TGG AAT TTC GTG TGG GGT CAA GGA ACC CGA ATT ACA GTC TCG GCT
A R G F G G S D W N F V W G Q G T R I T V S A
155196 GCG AGA GGA TTT GCC GGT TAT GAG TGG AGT TTC CTC TGG GGT CAG GGA ACT CTG GTC ATA GTC TCC TCT
A R G F A G Y E W S F L W G Q G T L V I V S S

IGHV1-2*02                                IGHJ5*02
GGG AGA GA                                AC AAC TGG TTC GAC CCC TGG GGC CAG GGA ACC CTG GTC ACC GTC TCC TCA
A R IGHD7-27*01 N W F D P W G Q G T L V T V S S
CTA ACT GGG GA
L T G
128419 GTC AAG GGG ACT GGG GGC AAT GAA TGG GGT TTC GTC TGG GGC CAG GGA TCC CTG GTC GTC GTC TCG CCA
V K G T G G N E W G F V W G Q G S L V V V S P
272066 GTC AAG GGG ACT GGA GGC AAT GAA TGG GGT TTC TCG TGG GGC CAG GGA ACC GTG GTC GTC GTC TCG CCA
V K G T G G N E W G F S W G Q G T V V V V S P
406425 GTC AAG GGG ACT GGA GGC AAT GAG TGG GGT TTC GTC TGG GGC CAG GGT ACG GTG GTC GTC GTC TCG CCA
V K G T G G N E W G F V W G Q G T V V V V S P

IGHV1-2*02                                IGHJ5*02
GCG AGA GA                                AC AAC TGG TTC GAC CCC TGG GGC CAG GGA ACC CTG GTC ACC GTC TCC TCA
A R IGHD3-16*02 N W F D P W G Q G T L V T V S S
GT ATT ATG ATT ACG TTT GGG GGA GTT ATC GTT ATA CC
I M I T F G G V I V I
155196 GCG AGA GGA TTT GCC GGT TAT GAG TGG AGT TTC CTC TGG GGT CAG GGA ACT CTG GTC ATA GTC TCC TCT
A R G F A G Y E W S F L W G Q G T L V I V S S
255552 GCG AGA GGA TTT GGG GGT TCT GAC TGG AGT TTC CTG TGG GGT CAG GGA ACC CTC ATA ATA GTC TCG TCT
A R G F G G S D W S F L W G Q G T L I I V S S
286804 GCG AGA GGA TTT GGG GGT TCT GAC TGG AAT TTC GTG TGG GGT CAA GGA ACC CGA ATT ACA GTC TCG GCT
A R G F G G S D W N F V W G Q G T R I T V S A

IGHD3-16*02
G TAT TAT GAT TAC GTT TGG GGG AGT TAT CGT TAT ACC
Y Y D Y V W G S Y R Y T
128419 GTC AAG GGG ACT GGG GGC AAT GAA TGG GGT TTC GTC TGG GGC CAG GGA TCC CTG GTC GTC GTC TCG CCA
V K G T G G N E W G F V W G Q G S L V V V S P
272066 GTC AAG GGG ACT GGA GGC AAT GAA TGG GGT TTC TCG TGG GGC CAG GGA ACC GTG GTC GTC GTC TCG CCA
V K G T G G N E W G F S W G Q G T V V V V S P
406425 GTC AAG GGG ACT GGA GGC AAT GAG TGG GGT TTC GTC TGG GGC CAG GGT ACG GTG GTC GTC GTC TCG CCA
V K G T G G N E W G F V W G Q G T V V V V S P

```

**Fig. S5 (continued)** (B) CDR H3 analysis of 6 heavy chain sequences with equal CDR H3 length, gVRC-H1<sub>dC38</sub> and gVRC-H3<sub>dC38</sub> to gVRC-H7<sub>dC38</sub> (index numbers in **Fig. 2**), supporting two separate groups. The nucleotide and amino acid sequences of the CDR H3 and J region of 6 heavy chains were aligned to the putative V, D and J germline genes. Putative nucleotide excisions are indicated with strikethrough lines. In blue are the putative TdT N additions in V-D and D-J junctions. In red are mutations from the putative germline genes and the TdT N additions. One alternative but unfavorable D gene (IGHD3-16\*02) is also indicated. Note that even when the same D gene was analyzed, the alignment and the reading frame of the D-gene is different between the two groups.

C

```

IGHV1-2*02                                IGHJ5*02
GCG AGA GA                                AC AAC TGG TTC GAC CCC TGG GGC CAG GGA ACC CTG GTC ACC GTC TCC TCA
A R                                        N W F D P W G Q G T L V T V S S

IGHD5-24*01
GT AGA GAT GGC TAC AAT TAG
R D G Y N Y

533111   GCC TTT GGG GCG GGA GAT GGT TGG GAT CTT GTC TGG GGC CAG GGA ACC CTG GTC ATC GTC TCC TCA
A F G A G D G W D L V W G Q G T L V I V S S
341509   GCC TTT GGG GCG GGA GAT GGT TGG GAT CTT GTC TGG GGC CAG GGA ACC CTG GTC ATC GTC TCC TCA
A F G A G D G W D L V W G Q G T L V I V S S
540042   ACA TAT GGG GCG GGA GAT GGA TGG AAT CTT GTC TGG GGC CAG GGA ACT CTG GTC ATC GTC TCC GCC
T Y G A G D G W N L V W G Q G T L V I V S A

IGHJ1*01
GCT GAA TAC TTC CAG EAC TGG GGC CAG GGC ACC CTG GTC ACC GTC TCC TCA
A E Y F Q H W G Q G T L V T V S S

533111   GCC TTT GGG GCG GGA GAT GGT TGG GAT CTT GTC TGG GGC CAG GGA ACC CTG GTC ATC GTC TCC TCA
A F G A G D G W D L V W G Q G T L V I V S S
341509   GCC TTT GGG GCG GGA GAT GGT TGG GAT CTT GTC TGG GGC CAG GGA ACC CTG GTC ATC GTC TCC TCA
A F G A G D G W D L V W G Q G T L V I V S S
540042   ACA TAT GGG GCG GGA GAT GGA TGG AAT CTT GTC TGG GGC CAG GGA ACT CTG GTC ATC GTC TCC GCC
T Y G A G D G W N L V W G Q G T L V I V S A

```

**Fig. S5 (continued)** (C) CD RH3 analysis of gVRC-H8<sub>dC38</sub> – gVRC-H10<sub>dC38</sub> (index number in **Fig. 3**), supporting that all 3 sequences belong to the same CDR H3 group. The nucleotide and amino acid sequences of CDR H3 and J region of the 3 heavy chains are aligned to the putative V, D and J germline genes. Putative nucleotide excisions are indicated with strikethrough lines. In blue are the putative TdT N additions in V-D and D-J junctions. In red are mutations from the putative germline genes and the TdT N additions. An alternative but unfavorable J gene (IGHJ1\*01) is also indicated. Compared to the favorable IGHJ5\*02 gene, IGHJ1\*01 has one additional mutation. The correspondence between sequence indexes and names (gVRC-H1-10<sub>dC38</sub>) for these 10 heavy chains can be found in **Fig. 3**.

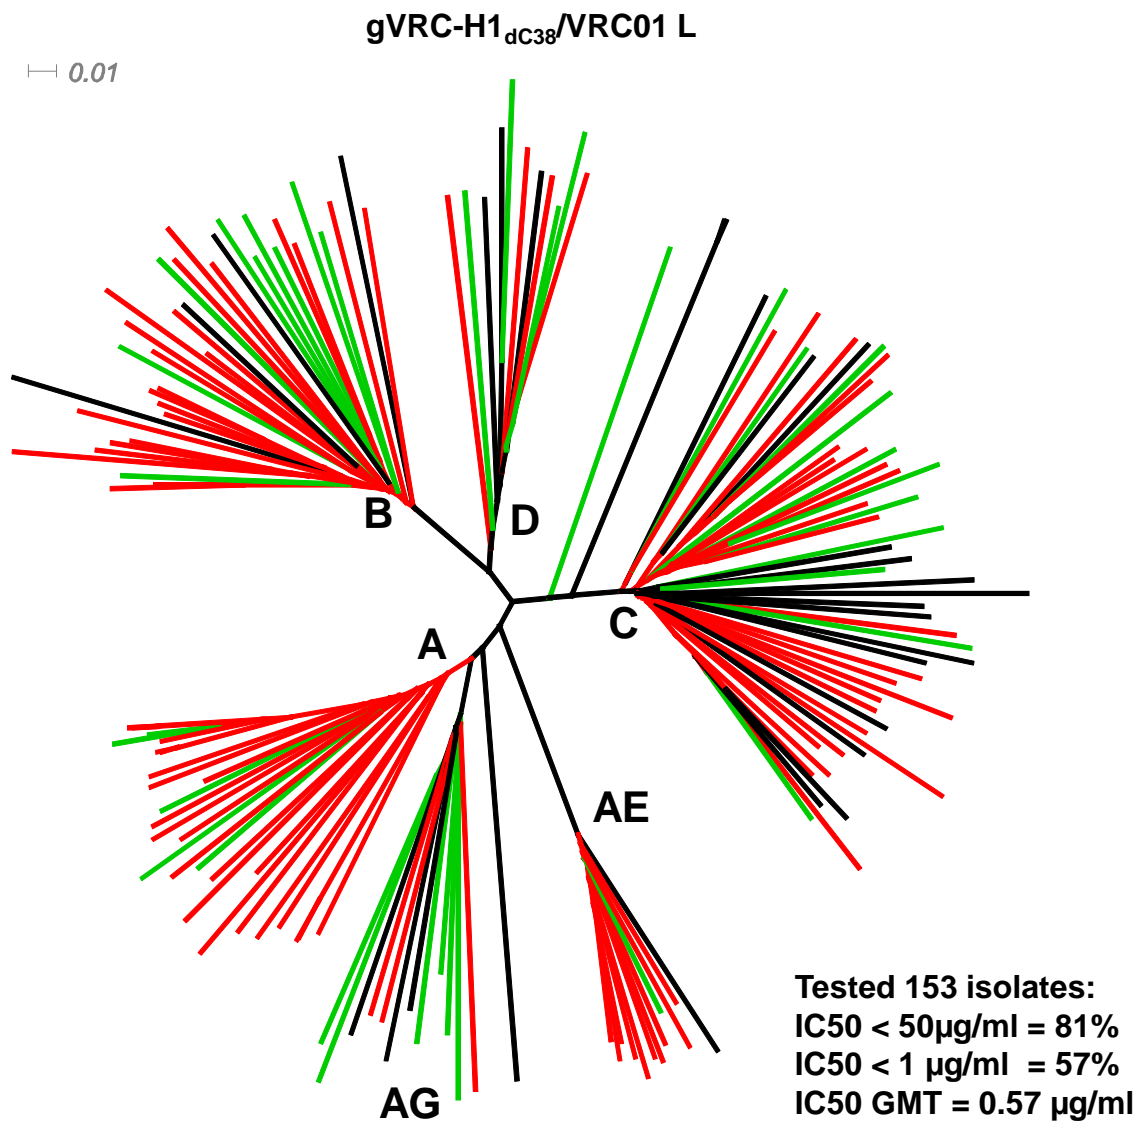

**Fig. S6.** Neutralization dendrogram. gVRC-H1<sub>dc38</sub>/VRC01L was tested against genetically diverse Env-pseudoviruses representing the major HIV-1 clades. Neighbor-joining trees display the protein distance of gp160 sequences from 153 HIV-1 isolates tested against VRC-H1<sub>dc38</sub>/VRC01L. A scale bar denotes 1% distance in amino acid sequence. Tree branches are colored by the neutralization potencies of gVRC-H1<sub>dc38</sub>/VRC01L against each particular virus.



**Table S1. Information on study donors.**

| <b>Donor</b>                 | <b>Gender, age, ethnicity</b> | <b>Clinical classification</b> | <b>Year of diagnosis</b> | <b>Sample time</b> | <b>CD4 count (cells/<math>\mu</math>l)</b> | <b>Plasma viral load (copies/ml)</b> | <b>Type of analysis</b>            |
|------------------------------|-------------------------------|--------------------------------|--------------------------|--------------------|--------------------------------------------|--------------------------------------|------------------------------------|
| <b>HIV-1 infected donors</b> |                               |                                |                          |                    |                                            |                                      |                                    |
| C38                          | Male, 54, African American    | Slow progressor                | 1987                     | 6/4/2008           | 323                                        | 46,800                               | Neutralization, 454 pyrosequencing |
| 1                            | Male, 45, African American    | Slow progressor                | 1985                     | 11/8/2006          | 545                                        | 19,260                               | Neutralization, 454 pyrosequencing |
| N32                          | Male, 60, Caucasian           | Slow progressor                | 1984                     | 10/15/2007         | 663                                        | 7,531                                | Neutralization, 454 pyrosequencing |
| 84                           | -                             | -                              | -                        | 11/20/2007         | -                                          | -                                    | 454 pyrosequencing                 |

“-” indicates “not applicable”.

**Table S2. PCR primers and DNA polymerase systems used to prepare donor C38 samples for 454 pyrosequencing.**

| Primer or data set               | Primer sequence or DNA polymerase                               |
|----------------------------------|-----------------------------------------------------------------|
| <b>a. Heavy chain sequencing</b> |                                                                 |
| Primer                           | Primer sequence (5' → 3')                                       |
| Forward H1 primers               |                                                                 |
| XLR-A_5'L-VH1                    | CCATCTCATCCCTGCGTGTCTCCGACTCAG ACAGGTGCCCACTCCAGGTGCAG          |
| XLR-A_5'L-VH1#2                  | CCATCTCATCCCTGCGTGTCTCCGACTCAG GCAGCCACAGGTGCCCACTCC            |
| XLR-A_5'L-VH1-24                 | CCATCTCATCCCTGCGTGTCTCCGACTCAG CAGCAGCTACAGGCACCCACGC           |
| XLR-A_5'L-VH1-69                 | CCATCTCATCCCTGCGTGTCTCCGACTCAG GGCAGCAGCTACAGGTGTCCAGTCC        |
| Forward G1 primers               |                                                                 |
| XLR-A_VH1 LEADER-A               | CCATCTCATCCCTGCGTGTCTCCGACTCAG ATGGACTGGACCTGGAGGAT             |
| XLR-A_VH1 LEADER-B               | CCATCTCATCCCTGCGTGTCTCCGACTCAG ATGGACTGGACCTGGAGCAT             |
| XLR-A_VH1 LEADER-C               | CCATCTCATCCCTGCGTGTCTCCGACTCAG ATGGACTGGACCTGGAGAAT             |
| XLR-A_VH1 LEADER-D               | CCATCTCATCCCTGCGTGTCTCCGACTCAG GGTTCTCTTTGTGGTGGC               |
| XLR-A_VH1 LEADER-E               | CCATCTCATCCCTGCGTGTCTCCGACTCAG ATGGACTGGACCTGGAGGGT             |
| XLR-A_VH1-LEADER-F               | CCATCTCATCCCTGCGTGTCTCCGACTCAG ATGGACTGGATTTGGAGGAT             |
| XLR-A_VH1-LEADER-G               | CCATCTCATCCCTGCGTGTCTCCGACTCAG AGGTTCTCTTTGTGGTGGCAG            |
| Reverse primers                  |                                                                 |
| XLR-B_3C <sub>γ</sub> CH1#2      | CCTATCCCCTGTGTGCCTTGGCAGTCTCAG GG GGA AGA CCG ATG GGC CCT TGG T |
| XLR-B_3C <sub>μ</sub> CH1        | CCTATCCCCTGTGTGCCTTGGCAGTCTCAG GGAATTCTCACAGGAGACGA             |
| Sequence data set                | DNA polymerase system                                           |
| H1 primers                       | Invitrogen Platinum <i>Taq</i> HiFi DNA polymerase              |
| G1 primers                       | FinnzymesPhusionHiFi DNA polymerase                             |
| <b>b. Light chain sequencing</b> |                                                                 |
| Primer                           | Primer sequence (5' → 3')                                       |
| Forward κ primers                |                                                                 |
| XLR-A_5'L-VK1/2                  | CCATCTCATCCCTGCGTGTCTCCGACTCAG ATGAGGSTCCCYGCTCAGCTCCTGGG       |
| XLR-A_5'L-VK3                    | CCATCTCATCCCTGCGTGTCTCCGACTCAG CTCTTCTCTGCTACTCTGGCTCCCAG       |
| XLR-A_5'L-VK4                    | CCATCTCATCCCTGCGTGTCTCCGACTCAG ATTTCTCTGTGCTCTGGATCTCTG         |
| Reverse κ primers                |                                                                 |
| XLR-B_3'CK1                      | CCTATCCCCTGTGTGCCTTGGCAGTCTCAG CAGCAGGCACACAACAGAGGCAGTTCC      |
| Forward λ primers                |                                                                 |
| XLR-A_5'L-VL1/2                  | CCATCTCATCCCTGCGTGTCTCCGACTCAG GCACAGGGTCTCTGGGCCAGTCTG         |
| XLR-A_5'L-VL3                    | CCATCTCATCCCTGCGTGTCTCCGACTCAG GCTCTGTGACCTCCTATGAGCTG          |
| XLR-A_5'L-VL4/5                  | CCATCTCATCCCTGCGTGTCTCCGACTCAG GGTCTCTCTCSCAGCYTGTGCTG          |
| XLR-A_5'L-VL6                    | CCATCTCATCCCTGCGTGTCTCCGACTCAG GTTCTTGGGCCAATTTTATGCTG          |
| XLR-A_5'L-VL7/8                  | CCATCTCATCCCTGCGTGTCTCCGACTCAG GAGTGGATTCTCAGACTGTGGTG          |
| XLR-A_5'L-VL1#2                  | CCATCTCATCCCTGCGTGTCTCCGACTCAG GCTCACTGCACAGGGTCTGGGCC          |
| XLR-A_5'L-VL3-1                  | CCATCTCATCCCTGCGTGTCTCCGACTCAG GCTTACTGCACAGGATCCGTGGCC         |
| XLR-A_5'L-VL3-19                 | CCATCTCATCCCTGCGTGTCTCCGACTCAG ACTCTTGCATAGGTTCTGTGGTT          |
| XLR-A_5'L-VL3-21                 | CCATCTCATCCCTGCGTGTCTCCGACTCAG TCTCACTGCACAGGCTCTGTGACC         |
| XLR-A_5'L-VL7-43                 | CCATCTCATCCCTGCGTGTCTCCGACTCAG ACTTGCTGCCAGGGTCCAATTC           |
| Reverse λ primers                |                                                                 |
| XLR-B_3'CL                       | CCTATCCCCTGTGTGCCTTGGCAGTCTCAG CACCAGTGTGGCCTTGTGGCTTG          |

**Table S3. Output information from pipeline processing of 454 pyrosequencing data sets obtained for donor C38.<sup>a</sup>**

| Chain (primers)       | <Length> | Step 1 <sup>b</sup> |                               | Step 2 <sup>b</sup>            | Step 3 <sup>b</sup> |                            |
|-----------------------|----------|---------------------|-------------------------------|--------------------------------|---------------------|----------------------------|
|                       |          | N <sub>Total</sub>  | Perc <sub>&gt;400bp</sub> (%) | N <sub>germ</sub> (Germline)   | CC                  | <Perc <sub>Imp</sub> > (%) |
| H (IgVH1-H1)          | 414.8    | 460,706             | 90.0                          | 138,523 (IgHV1-2)              | 0.69                | 18.7                       |
| H (IgVH1-G1)          | 422.8    | 574,027             | 89.5                          | 168,365 (IgHV1-2)              | 0.70                | 14.5                       |
| κ (IgVK) <sup>c</sup> | 401.1    | 257,910             | 82.6                          | 48,347 (IgKV3-20) <sup>d</sup> | 0.65                | 17.0                       |
| λ (IgVL) <sup>c</sup> | –        | –                   | –                             | – (–)                          | 0.71                | 19.0                       |
| κ (IgVK3)             | 401.2    | 448,125             | 83.3                          | 90,764 (IgKV3-20) <sup>d</sup> | 0.66                | 15.3                       |

<sup>a</sup> The items listed in the table include antibody chain sequenced and germline family amplified by gene-specific primers, average read length, total number of reads, percentage of long reads (over 400bp), number of reads with the same germline origin as the confirmed VRC01-class antibodies from donor C38, the correlation coefficient between number of insertion/deletion errors in 454-derived sequence and quality improvement after error correction (P-value <0.001 throughout), and the averaged percent improvement of sequence quality after error correction.

<sup>b</sup> The steps from which the output information was obtained. Note that only results from the first three steps are presented in this table. The identities to known VRC01-class antibody chains from the same donor were calculated in step 4 and the CDR H3- or L3-specific analysis was carried out in step 5. The results from steps 4 and 5 were used to generate the identity/divergence plots and phylogenetic dendrograms. A detailed description of the computational pipeline, *Antibodyomics 1.0*, can be found in SI.

<sup>c</sup> In the first sequencing experiment of donor C38 light chains, since the germline gene of VRC01-class antibodies was unknown, we used primers to amplify both κ and λ germline V genes. After assigning germline V genes, the sequencing reads were divided into κ and λ data sets, which were processed separately.

<sup>d</sup> Due to the high similarity between IgKV3-11, IgKV3-20, IgKV3-NL1 and IgKV3-NL5, as well as the ambiguity caused by the high level of somatic hypermutations in VRC01-class light chains, sequences might have been misassigned. As a precaution of missing relevant light chains, sequences in these four germline families were combined in the bioinformatics analysis.

**Table S4. CDR H3 groups identified from donor 74 454-pyrosequencing data derived from H1 primer amplification.<sup>a</sup>**

| Germline Nseq (Nseq>20%)     | Group <sup>b</sup> | Nseq (Perc %) | CDR H3 length | Most represented CDR H3 sequence |
|------------------------------|--------------------|---------------|---------------|----------------------------------|
| IGHV1-2<br>111692<br>(6240)  | Group 1            | 2490 (39.9%)  | 14            | QKFARGDQGWFDDL                   |
|                              | Group 2            | 1424 (23.0%)  | 17            | QKFESRYTGGQGWYFDL                |
|                              | Group 3            | 908 (14.6%)   | 17            | KTKGDVSGDGRGFFFDL                |
|                              | Group 4            | 248 (4.0%)    | 16            | QKFEKYTGGQGWYFDL                 |
|                              | Total              | 5070 (81.3%)  |               |                                  |
| IGHV1-8<br>34454<br>(557)    | Group 1            | 388 (69.7%)   | 12            | GRGGSDQNHFDL                     |
|                              | Group 2            | 110 (19.7%)   | 15            | GLRLSFGDLFNWFDL                  |
|                              | Total              | 498 (89.4%)   |               |                                  |
| IGHV1-18<br>100086<br>(246)  | Group 1            | 40 (16.3%)    | 14            | QKFARGDQGWFDDL                   |
|                              | Total              | 40 (16.3%)    |               |                                  |
| IGHV1-46<br>35478<br>(41)    | Group 1            | 14 (34.1%)    | 23            | EAELTYRFVGGEGHDYDRSLWFDA         |
|                              | Total              | 14 (34.1%)    |               |                                  |
| IGHV1-69<br>295499<br>(3415) | Group 1            | 489 (14.3%)   | 17            | DLLIRGVTWKLQNHFDL                |
|                              | Group 2            | 459 (13.4%)   | 14            | GMGPTAAMENYFDS                   |
|                              | Group 3            | 458 (13.4%)   | 17            | DPLVRGRTWKMLHYFDS                |
|                              | Group 4            | 335 (9.8%)    | 14            | EVGRGVNDVSGMDV                   |
|                              | Group 5            | 331 (9.7%)    | 17            | DPLVQGRTWKTLNYFDP                |
|                              | Group 6            | 249 (7.3%)    | 17            | DGRGYDNSGYLGDFFH                 |
|                              | Total              | 2321 (68.0%)  |               |                                  |

<sup>a</sup> The listed items include name of IGHV1 gene family together with total number of sequences ( $N_{seq}$ ) and number of sequences with a divergence of 20% or greater (Nseq>20%), group index, number of sequences within a particular group (and corresponding percentage), length of the heavy chain complementarity-determining region 3 (CDR H3) and the most representative CDR H3 within the group.

<sup>b</sup> An iterative clustering procedure was utilized to define unique CDR H3 groups within an IGHV1 family. In each iteration, an all-to-all sequence comparison was carried out to determine the largest CDR H3 group using a 5-nucleotide cutoff, and then the remaining data set was subjected to the next iteration of clustering analysis. This procedure was terminated when a CDR H3 group with less than 300 sequences was identified.

**Table S5. Lineage rank analysis of donor 74 454-pyrosequencing data derived from H1 primer amplification.<sup>a</sup>**

| Germline Nseq<br>(Nseq>20%)  | Lineage <sup>b</sup> | Nseq (Perc %) | CDR<br>H3<br>length | Most represented<br>CDR H3 sequence | <Divg>/<br><Var> (%) |
|------------------------------|----------------------|---------------|---------------------|-------------------------------------|----------------------|
| IGHV1-2<br>111692<br>(6240)  | Lineage 1            | 2490 (39.9%)  | 14                  | QKFARGDQGWFDDL                      | 30.0%/3.6%           |
|                              | Lineage 2            | 1424 (23.0%)  | 17                  | QKFE SRYTGGQGWYFDDL                 | 32.0%/3.6%           |
|                              | Total                | 3914 (62.7%)  |                     |                                     |                      |
| IGHV1-8<br>34454<br>(557)    | —                    | —             | —                   | —                                   | —                    |
|                              | —                    | —             | —                   | —                                   | —                    |
|                              | Total                | 0 (0.0%)      |                     |                                     |                      |
| IGHV1-18<br>100086<br>(246)  | —                    | —             | —                   | —                                   | —                    |
|                              | —                    | —             | —                   | —                                   | —                    |
|                              | Total                | 0 (0.0%)      |                     |                                     |                      |
| IGHV1-46<br>35478<br>(41)    | —                    | —             | —                   | —                                   | —                    |
|                              | —                    | —             | —                   | —                                   | —                    |
|                              | Total                | 0 (0.0%)      |                     |                                     |                      |
| IGHV1-69<br>295499<br>(3415) | Lineage 1            | 1279 (37.5%)  | 17                  | DLLIRGVTWKLQNHFDL                   | 21.4%/7.8%           |
|                              | Total                | 1279 (37.5%)  |                     |                                     |                      |
|                              |                      |               |                     |                                     |                      |

<sup>a</sup> The listed items include name of VH1 gene family together with total number of sequences ( $N_{seq}$ ) and number of sequences with a divergence of 20% or greater (Nseq>20%), lineage index, number of sequences within a particular lineage (and corresponding percentage), length of the heavy chain complementarity-determining region 3 (CDR H3) and the most representative CDR H3 within the lineage.

<sup>b</sup> The lineages were derived from the CDR H3 groups determined in Supplementary table X. An iterative clustering procedure was utilized to define unique CDR H3 groups within an IGHV1 family. In each iteration, an all-to-all sequence comparison was carried out to determine the largest CDR H3 group using a 5-nucleotide cutoff, and then the remaining data set was subjected to the next iteration of clustering analysis. This procedure was terminated when a CDR H3 group with less than 300 sequences was identified. Individual CDR H3 groups were merged into lineages when they shared visible similarity (amino acid composition and loop length) in CDR H3 region and the V gene variation was not significantly increased upon group merging.

**Table S6. CDR H3 groups identified from donor C38 454-pyrosequencing data derived from H1 primer amplification.<sup>a</sup>**

| Germline<br>Nseq<br>(Nseq>20%) | Group <sup>b</sup> | Nseq (Perc %) | CDR H3<br>length | Most represented<br>CDR H3 sequence |
|--------------------------------|--------------------|---------------|------------------|-------------------------------------|
| IGHV1-2<br>131108<br>(8750)    | Group 1            | 4397 (50.3%)  | 17               | ALTRTVSMNNGRAALDL                   |
|                                | Group 2            | 630 (7.2%)    | 9                | DVWEKALDI                           |
|                                | Group 3            | 451 (5.2%)    | 9                | DVQDGPLDL                           |
|                                | Group 4            | 326 (3.7%)    | 17               | GLTRTLSLNNGRAAFDL                   |
|                                | Group 5            | 265 (3.0%)    | 11               | EDYRMGAPFDY                         |
|                                | Total              | 6069 (69.4%)  |                  |                                     |
| IGHV1-8<br>47678<br>(5138)     | Group 1            | 2072 (40.3%)  | 18               | AASRHCDKRRRCYWGTQNL                 |
|                                | Group 2            | 886 (17.2%)   | 18               | AASKHCGRRRRCFWGTQNL                 |
|                                | Group 3            | 487 (9.5%)    | 17               | GPISHRDYALRRSWLDP                   |
|                                | Group 4            | 341 (6.6%)    | 14               | GQGGGDVTWDGMDV                      |
|                                | Group 5            | 288 (5.6%)    | 18               | AAPRKCDKRRRCYWGTENL                 |
|                                | Total              | 4074 (79.3%)  |                  |                                     |
| IGHV1-18<br>67304<br>(3817)    | Group 1            | 1146 (30.0%)  | 9                | DQQRVNFY                            |
|                                | Group 2            | 430 (11.3%)   | 12               | GMEGQTMFAFDI                        |
|                                | Group 3            | 312 (8.2%)    | 13               | GLQAPLETTTGGY                       |
|                                | Group 4            | 255 (6.7%)    | 9                | DHLRLNFY                            |
|                                | Total              | 2143 (56.1%)  |                  |                                     |
| IGHV1-46<br>34565<br>(1057)    | Group 1            | 343 (32.5%)   | 17               | ALTRTLSMNNGRAALDL                   |
|                                | Group 2            | 184 (17.4%)   | 13               | GHLRVFDWGHFDA                       |
|                                | Total              | 527 (49.9%)   |                  |                                     |
| IGHV1-69<br>104848<br>(11290)  | Group 1            | 2859 (25.3%)  | 14               | GGGHVVVAVGTFDV                      |
|                                | Group 2            | 1571 (13.9%)  | 13               | REKAYDNSGLFDY                       |
|                                | Group 3            | 1336 (11.8%)  | 14               | VAGAYIVGKIFYFQS                     |
|                                | Group 4            | 1195 (10.6%)  | 16               | RPKYSHPSEAHLPFDY                    |
|                                | Group 5            | 358 (3.2%)    | 13               | DGGTAATLYVFQS                       |
|                                | Group 6            | 286 (2.5%)    | 14               | GGAHVVLSAGNFDV                      |
| Total                          | 7605 (67.4%)       |               |                  |                                     |

<sup>a</sup> The listed items include name of VH1 gene family together with total number of sequences ( $N_{seq}$ ) and number of sequences with a divergence of 20% or greater (Nseq>20%), group index, number of sequences within a particular group (and corresponding percentage), length of the heavy chain complementarity-determining region 3 (CDR H3) and the most representative CDR H3 within the group.

<sup>b</sup> An iterative clustering procedure was utilized to define unique CDR H3 groups within an IGHV1 family. In each iteration, an all-to-all sequence comparison was carried out to determine the largest CDR H3 group using a 5-nucleotide cutoff, and then the remaining data set was subjected to the next iteration of clustering analysis. This procedure was terminated when a CDR H3 group with less than 300 sequences was identified.

**Table S7. Lineage rank analysis of donor C38 454-pyrosequencing data derived from H1 primer amplification.<sup>a</sup>**

| GermlineNseq<br>(Nseq>20%)    | Lineage <sup>b</sup> | Nseq (Perc %) | CDR-<br>H3<br>length | Most represented<br>CDR-H3 sequence | <Divg>/<br><Var> (%) |
|-------------------------------|----------------------|---------------|----------------------|-------------------------------------|----------------------|
| IGHV1-2<br>131108<br>(8750)   | Lineage 1            | 4723 (54.0%)  | 17                   | ALTRTVSMNNGRAALDL                   | 26.9%/6.2%           |
|                               | Total                | 4723 (54.0%)  |                      |                                     |                      |
| IGHV1-8<br>47678<br>(5138)    | Lineage 1            | 3246 (63.2%)  | 18                   | AASRHCDKRRRCYWGTQNL                 | 24.5%/8.3%           |
|                               | Total                | 3246 (63.2%)  |                      |                                     |                      |
| IGHV1-18<br>67304<br>(3817)   | Lineage 1            | 1401 (36.7%)  | 9                    | DQQRVNFYD                           | 23.5%/10.3%          |
|                               | Total                | 1401 (36.7%)  |                      |                                     |                      |
| IGHV1-46<br>34565<br>(1057)   | —                    | —             | —                    | —                                   | —                    |
|                               | Total                | 0 (0.0%)      |                      |                                     |                      |
| IGHV1-69<br>104848<br>(11290) | Lineage 1            | 3145 (27.9%)  | 14                   | GGGHVVVAVGTFDV                      | 21.2%/4.0%           |
|                               | Lineage 2            | 1571 (13.9%)  | 13                   | REKAYDNSGLFDY                       | 22.0%/2.8%           |
|                               | Lineage 3            | 1336 (11.8%)  | 14                   | VAGAYIVGKFYFQS                      | 23.4%/0.6%           |
|                               | Lineage 4            | 1195 (10.6%)  | 16                   | RPKYSHPSEAHLPFDY                    | 22.6%/4.7%           |
|                               | Total                | 7247 (64.2%)  |                      |                                     |                      |

<sup>a</sup> The listed items include name of VH1 gene family together with total number of sequences ( $N_{seq}$ ) and number of sequences with a divergence of 20% or greater (Nseq>20%), lineage index, number of sequences within a particular lineage (and corresponding percentage), length of the heavy chain complementarity-determining region 3 (CDR H3) and the most representative CDR H3 within the lineage.

<sup>b</sup> The lineages were derived from the CDR H3 groups determined in Supplementary table X. An iterative clustering procedure was utilized to define unique CDR H3 groups within an IGHV1 family. In each iteration, an all-to-all sequence comparison was carried out to determine the largest CDR H3 group using a 5-nucleotide cutoff, and then the remaining data set was subjected to the next iteration of clustering analysis. This procedure was terminated when a CDR H3 group with less than 300 sequences was identified. Individual CDR H3 groups were merged into lineages when they shared visible similarity (amino acid composition and loop length) in CDR H3 region and the V gene variation was not significantly increased upon group merging.

**Table S8. CDR H3 groups identified from donor C38 454-pyrosequencing data derived from G1 primer amplification.<sup>a</sup>**

| Germline<br>Nseq<br>(Nseq>20%) | Lineage      | Nseq(Perc %)         | CDR H3<br>length | Most represented<br>CDR H3 sequence |
|--------------------------------|--------------|----------------------|------------------|-------------------------------------|
| IGHV1-2<br>163108<br>(32317)   | Lineage 1    | 9126 (28.2%)         | 17               | ALTRTVSMNNGRAALDL                   |
|                                | Lineage 2    | 3470 (10.7%)         | 20               | STSITLFGFIVGHYYYAMDV                |
|                                | Lineage 3    | 2238 (6.9%)          | 20               | TTAVTMF'SMIVGHYYYAMDI               |
|                                | Lineage 4    | 1747 (5.4%)          | 9                | DVWEKALDI                           |
|                                | Lineage 5    | 1425 (4.4%)          | 11               | EDYRMGAPFDY                         |
|                                | Lineage 6    | 1424 (4.4%)          | 9                | DVQDGPLDL                           |
|                                | Lineage 7    | 1308 (4.1%)          | 17               | GLTRTSSVNHGRAAFDL                   |
|                                | Lineage 8    | 1290 (4.0%)          | 12               | ECEYDILSGCLM                        |
|                                | Lineage 9    | 932 (2.9%)           | 17               | ALTRTVSVNHGRAALDL                   |
|                                | Lineage 10   | 656 (2.0%)           | 17               | ALTRTISANHGRAAFDL                   |
|                                | Lineage 11   | 653 (2.0%)           | 13               | GPVVGVGDFWDFP                       |
|                                | Lineage 12   | 459 (1.4%)           | 16               | ALTRTLSMNHGCLDL                     |
|                                | Lineage 13   | 402 (1.2%)           | 20               | STSVTLFGFILGHYYYAMDI                |
|                                | Lineage 14   | 366 (1.1%)           | 17               | ALTRTISSNHGRAALDL                   |
|                                | Lineage 15   | 326 (1.0%)           | 9                | DAQEGDLES                           |
|                                | Lineage 16   | 302 (0.9%)           | 20               | TTAITMFGLI IAHHYYAMDV               |
|                                | Lineage 17   | 265 (0.8%)           | 20               | TTAITMFGLIVGHYYYAMDI                |
|                                | <b>Total</b> | <b>26389(81.7%)</b>  |                  | <b>6 non-redundant lineages</b>     |
| IGHV1-8<br>49151<br>(9907)     | Lineage 1    | 3505(35.4%)          | 18               | AASRHCDKRRRCYWGTQNL                 |
|                                | Lineage 2    | 1833(18.5%)          | 14               | GQGGGDVTWDGMDV                      |
|                                | Lineage 3    | 1206 (12.2%)         | 18               | AASKHCGRRRCFWGTQNL                  |
|                                | Lineage 4    | 713 (7.2%)           | 17               | GPI SHRDYALRRSWLDP                  |
|                                | Lineage 5    | 501 (5.1%)           | 18               | AAPRKCDKRRRCYWGTE NL                |
|                                | Lineage 6    | 295 (3.0%)           | 13               | ARGGDVTWDSL DV                      |
|                                | <b>Total</b> | <b>8053 (81.3%)</b>  |                  | <b>4 non-redundant lineages</b>     |
| IGHV1-18<br>90097<br>(16836)   | Lineage 1    | 7180 (42.6%)         | 14               | RQYRGTSSGGWFDP                      |
|                                | Lineage 2    | 2268 (13.5%)         | 9                | DQQRVNFYD                           |
|                                | Lineage 3    | 972 (5.8%)           | 12               | GMEGQTM TAFDI                       |
|                                | Lineage 4    | 949 (5.6%)           | 14               | RQYRGTSGAGWFDP                      |
|                                | Lineage 5    | 932 (5.5%)           | 16               | IWPSSQNPVRLLEWSS                    |
|                                | Lineage 6    | 658 (3.9%)           | 16               | IWPSPHPPVRFLEWSH                    |
|                                | Lineage 7    | 509 (3.0%)           | 9                | DHLRLNFYD                           |
|                                | Lineage 8    | 337 (2.0%)           | 19               | TAYLGYCSSFSCSTYYFDL                 |
|                                | Lineage 9    | 314 (1.9%)           | 19               | TPYLGYCASLTCPTYLDE                  |
|                                | Lineage 10   | 167 (1.0%)           | 13               | GLQAPLETPGGY                        |
|                                | <b>Total</b> | <b>14286 (84.9%)</b> |                  | <b>6 non-redundant lineages</b>     |
| IGHV1-46<br>71270<br>(24550)   | Lineage 1    | 2897 (11.8%)         | 13               | GHLRVFDWGHFDA                       |
|                                | Lineage 2    | 1873 (7.6%)          | 20               | TTAVTMFGLIVGHYYYAMDV                |
|                                | Lineage 3    | 1488 (6.1%)          | 13               | GDGSHYYNTYMDV                       |
|                                | Lineage 4    | 1262 (5.1%)          | 20               | TTAVTMFAMIVGHYYYAMDI                |
|                                | Lineage 5    | 1136 (4.6%)          | 17               | ALTRTVSTNQGRAALDL                   |
|                                | Lineage 6    | 1006(4.1%)           | 18               | DQGVDPATSRSTLEYFQY                  |
|                                | Lineage 7    | 966 (3.9%)           | 20               | SPGITMFGYIVGHRHFALDV                |
|                                | Lineage 8    | 856 (3.5%)           | 20               | TTAVTMFGLI IAHHYYAMDI               |
|                                | Lineage 9    | 853 (3.5%)           | 13               | GDGNWFYSFYMDV                       |
|                                | Lineage 10   | 786 (3.2%)           | 28               | DVFERVPRPGAKSLGDVQTKEDGSYMDV        |
|                                | Lineage 11   | 636 (2.6%)           | 20               | SPAVTMFGLIVGHRHYALDV                |



**Table S8. Continued.**

|                               |            |               |    |                          |
|-------------------------------|------------|---------------|----|--------------------------|
|                               | Lineage 12 | 619 (2.5%)    | 12 | VFSWGEGTYFDR             |
|                               | Lineage 13 | 574 (2.3%)    | 11 | GVGPGTPPFYD              |
|                               | Lineage 14 | 534 (2.2%)    | 20 | TTAITMFSLIVGHYYYAMDV     |
|                               | Lineage 15 | 475 (1.9%)    | 20 | SPGVTFFFGYIVGHRHRALDV    |
|                               | Lineage 16 | 468 (1.9%)    | 20 | STAVTLFGLIVGHYYYAMDV     |
|                               | Lineage 17 | 453 (1.8%)    | 20 | SPAITMFGYIVGHRYFALDV     |
|                               | Lineage 18 | 400 (1.6%)    | 20 | TTAVTMFGLILAHYYYAFDV     |
|                               | Lineage 19 | 278 (1.1%)    | 20 | TTAVTMFALIVGHYYYAMDV     |
|                               | Total      | 17560 (71.5%) |    | 9 non-redundant lineages |
|                               | Lineage 1  | 5676 (24.1%)  | 14 | GGGHVVVAVGTFDV           |
|                               | Lineage 2  | 3835 (16.3%)  | 16 | RPKYSHASEAHLPFYD         |
| IGHV1-69<br>118368<br>(23545) | Lineage 3  | 3266 (13.9%)  | 14 | VAGAYIVGKIFYFQS          |
|                               | Lineage 4  | 3155 (13.4%)  | 13 | REKAYDNSGLFDY            |
|                               | Lineage 5  | 1392 (5.9%)   | 13 | DGGTAATLYVFQS            |
|                               | Lineage 6  | 471 (2.0%)    | 14 | GGAHVVLSAGNFVD           |
|                               | Lineage 7  | 371 (1.6%)    | 14 | GGDMSWWPWGTFDV           |
|                               | Lineage 8  | 323 (1.4%)    | 20 | GRKASSGWFQAVVYHYPMDA     |
|                               | Lineage 9  | 317 (1.3%)    | 13 | ALGGGYHDVVAGH            |
|                               | Lineage 10 | 295 (1.3%)    | 18 | LGYSYGADGFLQTSNDDL       |
|                               | Total      | 19101 (81.1%) |    | 7 non-redundant lineages |

<sup>a</sup> The listed items include name of VH1 gene family together with total number of sequences ( $N_{seq}$ ) and number of sequences with a divergence of 20% or greater ( $N_{seq>20\%}$ ), group index, number of sequences within a particular group (and corresponding percentage), length of the heavy chain complementarity-determining region 3 (CDR H3) and the most representative CDR H3 within the group.

<sup>b</sup> An iterative clustering procedure was utilized to define unique CDR H3 groups within an IGHV1 family. In each iteration, an all-to-all sequence comparison was carried out to determine the largest CDR H3 group using a 5-nucleotide cutoff, and then the remaining data set was subjected to the next iteration of clustering analysis. This procedure was terminated when a CDR H3 group with less than 300 sequences was identified.

**Table S9. Lineage rank analysis of donor C38 454-pyrosequencing data derived from G1 primer amplification.<sup>a</sup>**

| GermlineNseq<br>(Nseq>20%)    | Lineage <sup>b</sup> | Nseq (Perc %) | CDR-<br>H3<br>length | Most represented<br>CDR-H3 sequences <sup>c</sup> | <Divg>/<br><Var> (%) |
|-------------------------------|----------------------|---------------|----------------------|---------------------------------------------------|----------------------|
| IGHV1-2<br>163108<br>(32317)  | Lineage 1            | 12847 (39.8%) | 17                   | ALTRTVSMNNGRAALDL                                 | 26.1%/9.2%           |
|                               | Lineage 2            | 6677 (20.7%)  | 20                   | STSITLFGFIVGHYYYAMDV                              | 24.6%/15.3%          |
|                               | Lineage 3            | 1747 (5.4%)   | 9                    | DVWEKALDI                                         | 22.8%/7.9%           |
|                               | Lineage 4            | 1425 (4.4%)   | 11                   | EDYRMGAPFDY                                       | 24.4%/5.7%           |
|                               | Lineage 5            | 1424 (4.4%)   | 9                    | DVQDGPLDL                                         | 24.7%/13.5%          |
|                               | Lineage 6            | 1290 (4.0%)   | 12                   | ECEYDILSGCLM                                      | 24.3%/7.5%           |
|                               | Total                | 25736 (78.6%) |                      |                                                   |                      |
| IGHV1-8<br>49151<br>(9907)    | Lineage 1            | 5212 (52.6%)  | 18                   | AASRHCDKRRRCYWGTQNL                               | 24.1%/7.7%           |
|                               | Lineage 2            | 1833 (18.5%)  | 14                   | GQGGGDVTWDGMDV                                    | 30.3%/3.3%           |
|                               | Total                | 7045 (71.1%)  |                      |                                                   |                      |
| IGHV1-18<br>90097<br>(16836)  | Lineage 1            | 8129 (48.3%)  | 14                   | RQYRGTSSGGWFDP                                    | 26.8%/12.3%          |
|                               | Lineage 2            | 2777 (16.5%)  | 9                    | DQQRVNFDY                                         | 23.3%/9.9%           |
|                               | Lineage 3            | 1590 (7.1%)   | 16                   | IWPSSQNPVRLLEWSS                                  | 31.6%/9.2%           |
|                               | Total                | 12496 (74.2%) |                      |                                                   |                      |
| IGHV1-46<br>71270<br>(24550)  | Lineage 1            | 5671 (23.1%)  | 20                   | TTAVTMFGLIVGHYYAMDV                               | 25.8%/14.7%          |
|                               | Lineage 2            | 2897 (11.8%)  | 13                   | GHLRVFDWGHFDA                                     | 30.8%/8.5%           |
|                               | Lineage 3            | 2530 (10.3%)  | 20                   | SPGITMFGYIVGHRHFALDV                              | 22.6%/9.2%           |
|                               | Lineage 4            | 1488 (6.1%)   | 13                   | GDGSHYYNTYMDV                                     | 22.6%/15.8%          |
|                               | Lineage 5            | 1136 (4.6%)   | 17                   | ALTRTVSTNQGRAALDL                                 | 27.7%/5.2%           |
|                               | Lineage 6            | 1006(4.1%)    | 18                   | DQGVDPATSRSTLEYFQY                                | 23.6%/6.8%           |
|                               | Total                | 14728 (60.0%) |                      |                                                   |                      |
| IGHV1-69<br>118368<br>(23545) | Lineage 1            | 6518 (27.7%)  | 14                   | GGGHVVAVGTFDV                                     | 20.9%/3.6%           |
|                               | Lineage 2            | 3835 (16.3%)  | 16                   | RPKYSHASEAHLPDFY                                  | 22.3%/3.7%           |
|                               | Lineage 3            | 3266 (13.9%)  | 14                   | VAGAYIVGKFYFQS                                    | 23.2%/0.3%           |
|                               | Lineage 4            | 3155 (13.4%)  | 13                   | REKAYDNSGLFDY                                     | 21.8%/2.6%           |
|                               | Lineage 5            | 1392 (5.9%)   | 13                   | DGGTAATLYVVFQS                                    | 23.1%/5.5%           |
|                               | Total                | 18166 (77.2%) |                      |                                                   |                      |

<sup>a</sup> The listed items include name of VH1 gene family together with total number of sequences ( $N_{seq}$ ) and number of sequences with a divergence of 20% or greater (Nseq>20%), lineage index, number of sequences within a particular lineage (and corresponding percentage), length of the heavy chain complementarity-determining region 3 (CDR H3) and the most representative CDR H3 within the lineage.

<sup>b</sup> The lineages were derived from the CDR H3 groups determined in Supplementary table X. An iterative clustering procedure was utilized to define unique CDR H3 groups within an IGHV1 family. In each iteration, an all-to-all sequence comparison was carried out to determine the largest CDR H3 group using a 5-nucleotide cutoff, and then the remaining data set was subjected to the next iteration of clustering analysis. This procedure was terminated when a CDR H3 group with less than 300 sequences was identified. Individual CDR H3 groups were merged into lineages when they shared visible similarity (amino acid composition and loop length) in CDR H3 region and the V gene variation was not significantly increased upon group merging.

**Table S10. Expression of antibodies with selected donor C38 heavy chains paired with VRC01 light chain**

| No.                                                                                                         | Donor | Sequence ID | Yield*<br>(mg/L culture<br>sup) | Neutralization <sup>#</sup> | Amino acid sequence of heavy chain V domain                                                                                |
|-------------------------------------------------------------------------------------------------------------|-------|-------------|---------------------------------|-----------------------------|----------------------------------------------------------------------------------------------------------------------------|
| a. 2 selected sequences from cross-donor phylogenetic analysis of VH1-2 family from the H1-primer data set  |       |             |                                 |                             |                                                                                                                            |
| 1                                                                                                           | C38   | 304943      | 14.16                           | N                           | RVQLTQVWAQMRKPGASMRVSCETSGFRFRFTDSKIGWVRQAPGQPFWEWMLMESYVGRVHYAAQFRDRVTMTRDQVDFETAFLELSGLTLADTAIYYCVTAAGTNEWAFEWGQGTTRVISP |
| 2                                                                                                           | C38   | 255552      | 18.48                           | Y                           | QVTLVQSGNQLKRPASVRISCESTSGYNFMDHFHIVWRQVPGHGPELWGVNPRGGGVNYSRKFQGRFSMTRDVIYMETAYLDVTGLSPADTAVYYCARGFGGSDWVFLWGQGLTIVSS     |
| b. 10 selected sequences from cross-donor phylogenetic analysis of VH1-2 family from the G1-primer data set |       |             |                                 |                             |                                                                                                                            |
| 3                                                                                                           | C38   | 540042      | 12.00                           | Y                           | QVHLVQSGTQVKKPGASVRVSCETSGFKFLDSIIHWFRQAPGEGFLVWGMWIKPYTGSVNVYRRYQGRVSMTRDVYSDTAYMDLSGLNSDDTAVFYCTYGAGDGNLWVGQGLTIVISA     |
| 4                                                                                                           | C38   | 533111      | 17.40                           | Y                           | RVHLVQSGTQVKKPGASVKVSCETSGFKFLDSLIHWVRQAPGQGLYWMGWIKPYRGSVNYDGYFRGRVSMTRDIYDTAYMELSGLRSDDTAIYYCAFAGDGDWDLWVGQGLTIVISS      |
| 5                                                                                                           | C38   | 341509      | 15.24                           | Y                           | RVHLVQSGTQVKKPGASVKVSCETSGFKFLDSLIHWVRQAPGQGLYWMGWIKPYRGSVNYDGYFRGRVSMTRDIYDTAYLELSGLRSDDTAIYYCAFAGDGDWDLWVGQGLTIVISS      |
| 6                                                                                                           | C38   | 286804      | 7.44                            | Y                           | QVSLVQSGNQLKPGASVRISCESTSGYNFLNHFHIVWRQVPGHGLEWLVWINPRGGGVNYSRNFQGVSLTRNIDMETVYLDVRLTDPGDTAVYYCARGFGGSDWVFWGQGTTRITVISA    |
| 7                                                                                                           | C38   | 155196      | 4.80                            | Y                           | QVRLVQSGNQVRKPGASVRISCEASGYKFDHFHIVWRQVPGHGLEWLVWINPRGGGVNYSRNFQGVSLTRNIDMETVYLDVRLTDPGDTAVYYCARGFAGYEWVFLWGQGLTIVISS      |
| 8                                                                                                           | C38   | 406425      | 3.00                            | Y                           | RINLDQSGSQVKKSGASVRISCESTSGFKFMDSHLHWVRQVAGQPFWEWGMWIFTSGGGVNYSRNFQGVSLTRNIDMETVYLDVRLTDPGDTAVYYCARGFAGYEWVFLWGQGLTIVISS   |
| 9                                                                                                           | C38   | 128419      | 15.36                           | Y                           | RIELHQSGSQVKKSGASVRISCESTSGFKFMDSHLHWVRQVAGQPFWEWGMWIFTSGGGVNYSRNFQGVSLTRNIDMETVYLDVRLTDPGDTAVYYCARGFAGYEWVFLWGQGLTIVISS   |
| 10                                                                                                          | C38   | 272066      | 10.80                           | Y                           | RINLHQSGSQVKKSGASVRISCESTSGFKFMDSHLHWVRQVAGQPFWEWGMWIFTSGGGVNYSRNFQGVSLTRNIDMETVYLDVRLTDPGDTAVYYCARGFAGYEWVFLWGQGLTIVISS   |
| 11                                                                                                          | C38   | 240171      | 15.36                           | N                           | QVRLVQSGTQMKKPGSSVSKICDSTSGYKFDVFLIYFRHVPGREIEWIGLWIKPYGGGVNYSRNFQGVSLTRNIDMETVYLDVRLTDPGDTAVYYCARGFAGYEWVFLWGQGLTIVISS    |
| 12                                                                                                          | C38   | 534056      | 21.00                           | Y                           | QALVQSGSQMKKPGSDVRLSCQTSDAITKYFIHWIRQAPGKLEWIAWISPYGGGVNYSRNFQGVSLTRNIDMETVYLDVRLTDPGDTAVYYCARGFAGYEWVFLWGQGLTIVISS        |
| c. 35 selected sequences from 22 lineages in the lineage rank analysis of G1-primer data set                |       |             |                                 |                             |                                                                                                                            |
| 13                                                                                                          | C38   | 100588      | 17.40                           | N                           | QVQLLQSGSEIKRPGTSVTMSCTASGYNFNINWVRQAPGQPEWGMWISPTWGTSLAPRFHGRVALTRATASNTIYFLSNLRPDDTAMYFCARALTRTVSMNNGRAALDLWGQGLTIVTST   |
| 14                                                                                                          | C38   | 100096      | 15.00                           | N                           | QVRLVQSGPEVRRKPGASVTVSCASGYNINWVRQAPGQPEWGMWISPTWGTSLAPRFHGRVALTRATASNTIYFLSNLRPDDTAMYFCARALTRTVSMNNGRAALDLWGQGLTIVTST     |

|    |     |        |               |     |                                                                                                                                |
|----|-----|--------|---------------|-----|--------------------------------------------------------------------------------------------------------------------------------|
| 15 | C38 | 102341 | 17.76         | N   | QERLTQSGSKLARPGETSLKMSCKASGYTFTSYVHVWRQAPGHALEWLGEINPRSGGTNYAQFKQGRVAMTSDTSTINTVYLDLKLTSDDTAIYCSRSTISITLFGFVGHYYAMDVWGQGTAVVSS |
| 16 | C38 | 101970 | 12.60         | N   | QGHVQSESAVTKPGASVRLACATSGSFTSYLHWVRQAPGQHFWEINPLTGGTTYAQTFQGRVVMTTDSTNTVYLDLKRVSDDTAVYFCTRITAVTMFSMIVGHYYAMDIWGGTTLTVSP        |
| 17 | C38 | 100669 | 10.56         | N   | QVQLQQAEEVKPGTSTVRSVCGTSSFSVNPYVWVRLVPGQGLQWIGWIKPETGATKYAQKQDRVMTTNTSITAYMELGGLRYDDTAIYCASDVWEKALDIWGGTTLTVSS                 |
| 18 | C38 | 104123 | 7.32          | N   | QVHLEQSGTEVKPGTSTVRSVCRASSIINHMYVWVRLVPREGLEWWMGWINPKSGATNSARRLHDRVMTTNTSINTVYMLRGLLDDTGLYFCASDLWEKALDVWGGTTLTVSS              |
| 19 | C38 | 104936 | 10.20         | N   | QVQLQSESEMREPSSLRSCQASNYFSAYYHWRQVPGQGLEWIGYINPHNGDTNYAQDFQGRVTLTDDTSTINTAYMEFKMTFDDTAIYLCAREDYRMGAPFDYWGQGTVAISS              |
| 20 | C38 | 100996 | 17.52         | N   | QAQLKQSGADVKTGASIKLCKASGYFVRHYVHWLRQVPGKRLWWMGWISPNQNGGTFFGHNFRGRVAMSRODMSTSTFHLHLNLTDDTARYFCARDVQDGLDLWGGQSLTVSS              |
| 21 | C38 | 101323 | 12.12         | N   | QPQLKQSGADLRKPGASMNVSCTASGYFVRHYVHWVRQVPGKRLWWMGWINPNQNGGTLGQNFGRVALSRDMSTSTVSLQFLNLTDDTALYCARDVQDGLDLWGGQSLTVSS               |
| 22 | C38 | 100261 | 9.24          | N   | QAEFAQSGAELRKTGTSTIKVCKASGYVFTGHYIHWVRQAPGEGTLWGMWINPNTGVAKYSPNFEHVIIFTRDTSINTAYVEFASLTVDDTAIYCAECEYDILSGCLMWGGSLTVSS          |
| 23 | C38 | 105510 | 12.48         | N   | QLQLAQSGAEVTKGTTTVKVSCKTNEYAFTGHYIHWVRQAPGQGLKWMGWINPNSGDTKYSSDFEGRTIITRDTSTINTYLELTLDDTAMFYCAECEYDILSGCLMWGGSLTVSS            |
| 24 | C38 | 101517 | No expression | n/a | QGQLVQSGAAVQEPGATLRVSCRAFGLTLRNSDVHWVRQAPGQGLQWWMGNPSSGNTGFQYKFEDRIIMTWDTSTMTAHLEMLRSLTADTALYFCARAASRHCRRRCYWGQNLWGGQGIHVTVSS  |
| 25 | C38 | 101769 | 12.60         | N   | QGQLVQSGAAVEEPGATLSVSCRASGDLTNHDVHWVRQAPGQGLEFMGMWMPSSGNAGIHKFKGKISMTWDTFTATAYLSVTRLSADTAVYFCARAASKHCGRRRCYWGQNLWGGQTKVTVLS    |
| 26 | C38 | 100309 | 17.88         | N   | QVELLQSGPEVKTPGDSVNVSCQAVGYKFIKHDIWVRQAPGQGLEWWMGWINPETGKGAEKQDRMMSRDSRAMVILTSLSHVSFDDTAVYFCARGQGGGVDVWGMVWGRGTTVAVKT          |
| 27 | C38 | 105014 | 16.56         | N   | QVQLVQSGGEVKKPGASVKVSKASGYFLNHDVTWVRWSPGQGLEWMAWINVHDDTTKFAERFQGRISLTADTSTATVYLELRLSDDTGIYFCGRRQYRGTSSGGWFDPWGGQSLIIVSS        |
| 28 | C38 | 10107  | 16.68         | N   | QVQLVQSGGEVKKRPGASVKVSKASGYFLNHDVTWVRWSPGQGLEWMAWINVHDDTTKYADRFDRLTLTADTSTATVYLELRLSDDTGIYFCARRQYRGTSSGGWFDPWGGQSLIIVSS        |
| 29 | C38 | 102116 | 18.60         | N   | QIQLVQSGLEVRKPGASVKISCKATGFIFTSVGYSWVRQAPGKGFWEIGWVNPYNGVRVPTQRLQDRRLTAAADTSTNTVYMLKNLRPDDTAIYCARDQQRVNFYWGQGTTLTVTS           |
| 30 | C38 | 111905 | 12.48         | N   | QIQLIQSGPEVKKPGDSVKLSCQSSGFIFTSVGYSWVRQAPGQPFWEIAWVNPYNGVARPAQKLEDRMFLAKDASTSTVYMLRDLRPDDTAVYCARDHLRLNFDYWGQGTQVTVSS           |
| 31 | C38 | 105534 | 8.40          | N   | EIELLQSGPEMREPGASIRVCKTSGYEFDKYSITWVRQAPGKGFWEIGWVNPYNGVRVPTQRLQDRRLTAAADTSTNTVYMLKNLRPDDTAIYCARDQQRVNFYWGQGTQIIVSS            |
| 32 | C38 | 110795 | 13.80         | N   | QIQLQSGPEMREPGTISIRISCKTSNYDFDKYSITWVRQAPGKGFWEIGWVNPYNGVRVPTQRLQDRRLTAAADTSTNTVYMLKNLRPDDTAIYCARDQQRVNFYWGQGTQVTVAT           |
| 33 | C38 | 102146 | 17.52         | N   | REQLQSGTQVSLKPGASVKLCKASGYNFNSYVHVWRQAPGQGFWEINPFTGGTTYAEKHFDRVAMTSDTSTNTVYVLSRLTVDDTAVYCTRITAVTMFGLVGHYYAMDVWGQGTTLTVISA      |
| 34 | C38 | 102542 | 12.36         | N   | QVQLVQSGAAVRKPGASVQLACTSGYFTSYLHWVRQVPGHFEWIGEINPLTGGTTLAQAFKERVVMTSDTSAHTVYLDLRLSDDTAVYCTRITAVTMFAMIVGHYYAMDIWGRGTLIVSP       |
| 35 | C38 | 101345 | 10.80         | N   | QVQLQSGPEMKNPGTTLVSCRSTGFIFFDLHWVRQTPDHLRLQYLSISPGGAVDARRFEGRVSVTRDVSSTLHMEMRHLRYEDTATYFCARGHLRFVDFWGHFDWGGQTLTVISA            |

|    |     |        |               |     |                                                                                                                                     |
|----|-----|--------|---------------|-----|-------------------------------------------------------------------------------------------------------------------------------------|
| 36 | C38 | 101143 | 12.60         | N   | QVQLVQSGPEKKNPGASVKVSCQISGFLGDFLHWLRQEPQRLLYVGGMMNPFNGRAKAVARTFESRVSTRDMSTSTFHM MEMVDLRYGDTATYFCARGHYRVL DWGPLEDWGQGLTIVSA          |
| 37 | C38 | 101794 | 19.20         | N   | RVQFVQSGTEMKPKGASVTVSCKTSGFSFTSYLHWARLWVGRGLEWLG EIPNNGATTYAQAFQDRLSLTADKSSNTVSM DLGRLLVDDTAVYYCTRSPGITMFGYIVGHRHFALDVWGQGTIVSA     |
| 38 | C38 | 101685 | 20.52         | N   | RVEFLQSGAEVRKPGT SVKVS CRASGYTFTSYLHWVRQAPGQGLEW MGEINPTGGTTYAQRFRDRVSM TADTSTNTGFLDLSRLTVD TAVYYCTRSPA VTMFGLVGRHYALDVWGP GTAVTVSS |
| 39 | C38 | 109675 | 19.20         | N   | EVLLVQSGAEVKT PGASLKVSCQIGYIFTSNYVHWVRQAPGQGLQWMAFINPSDGKVNVAETFKGRLSVTRDTSINSVYMDLRLTFEDTATYCARGDGSHYNTYMDVWGKTTVTVSP              |
| 40 | C38 | 100794 | 18.00         | N   | LVQLDQSGLEVKKPGASVRISCKTSGYIFTHYIHWVRQAPGQGLVW MGFINPDGGSANFTQSFQGRATVTRDVP RNMVLELKNLQDDTATYCARGDGSHYNTYMDVWGKTTVAVSP              |
| 41 | C38 | 101019 | 18.12         | N   | QGQLLQSGTEIKRPGASVTVSCTASGYNFNSYFINWVRQAPGQGP EWMGWINPNTWNTLAPKFGHRVALTRATTSNIIYLSLFRPDDTAVYFCARALTRVSTNQG RAALDWGQGLTVLIVST        |
| 42 | C38 | 152185 | 3.00          | N   | QIQLVQSGAELKQAGT SVSISCKTSGYTF AFFIHWLRRAPGQGLEW MGIINPSGGTATYSPGFQGRLLMTRDSSRNIVYMDLNLTPQDTAVYFCARDQGPDPATSRSTLEYFQYWGQGLTVSVFP    |
| 43 | C38 | 100169 | 18.24         | N   | QVQLMQSGPEVKRPGSSVRVSCQASGVKLFHAIWVRQAPGQGLEW GSI PALASTKYGRNFQGRVSTADTSQNTVY MELTNLKPDDTAVYFCARGGGHVVA VAGTFD VWGQGSVTVSP          |
| 44 | C38 | 100767 | No expression | n/a | QVQLVQSGTEVKKPGSSVKLSCRASGGTFSHYAIHWVRQAPRHGLEW MGIIFGFVANNVAETFGQGRVALTADVSTASLTLSSLLADTALYCVLRPKYSHASEAHPDYWGLGLTVTVAS            |
| 45 | C38 | 100163 | 16.20         | N   | QERLVQSGAELAKPGSSVRVSCQASGDSFSSDPIAWVRQSPAGGLAWIGAHIPVFDMSRYSQRFQGRVTF TADRSSRTAYMELSHVQSEDTAVYCAK VAGAYIVGKFFYQSWGQGLTVSVSS        |
| 46 | C38 | 101382 | 18.96         | N   | QVTVMQSEAVVKKPGSSVRVSCSAGGSFSHYAMN WVRQAPGQGF EWMGIIIPAFGVVNYAQRFGGRITISANKETSTDFLDRSLTSGDTAVYCARREKAYD NSGLFDYWGQGLTVTVSS          |
| 47 | C38 | 103129 | 12.48         | N   | QVHLLQSGAEVKKPGSSVRLSCALAGGTGFGSIFWLRQTPMRGLEW MGTLPMLGTPNYAQPFIFGRLLTIDADKSTNTAHMELRGLTLD DTAIYYCARDGGTAATLVFQSWGPGTLTVSA          |

d. 3 selected sequences from cross-donor phylogenetic analysis of VH1-46 family from the G1-primer data set using 13 VH1-2 originated founder VRC01-like antibodies

|    |     |        |       |   |                                                                                                                             |
|----|-----|--------|-------|---|-----------------------------------------------------------------------------------------------------------------------------|
| 48 | C38 | 249368 | 8.52  | N | HDQLTQTETAVARPGATLNVSCATSGYTFVDYQIHWVRQAPGQGLQW MGLINPADGTTVFSFLFQGRLLDARDMSTKTYVMKLSRLTSDS ATYYCCKVFSWGEGTYFDRWGRGTHAVSS   |
| 49 | C38 | 237270 | 9.96  | N | HDQLTQTETAVTRPGATLNVSCATSGYTFVDYQIHWVRQAPGQGLQW MGLINPSDGTTFVSSLFQGRLLDARDMSTKTYMILSRLTSDS ATYYCCKVFSWGEGTYFDRWGRGTHAVSS    |
| 50 | C38 | 513421 | 13.32 | N | QVTLQSGTEVRKTGASVTISCKTSGYNFENYFIHWVRHSRPHGLDFLGTINPPSHRPSYADLLKGRLLTSDTSTATVSMGLTNLTSDDAVYCYVRDKIMTTFGDFIKSRYLQHWGQGHIVVSS |

\*no expression,yield was less than 0.60mg/L.

#Y, yes; N, no; n/a, not available.

**Table S11. Neutralization titers of 10 chimeric antibodies derived from 454 pyrosequencing of donor C38 against 20 HIV-1 clade A, B and C Env-pseudoviruses.<sup>a</sup>**

| Clade and virus         | Neutralization IC <sub>50</sub> titers (µg/ml) <sup>b</sup> |                                 |                                 |                                 |                                 |                                 |                                 |                                 |                                 |                                 |                                  |
|-------------------------|-------------------------------------------------------------|---------------------------------|---------------------------------|---------------------------------|---------------------------------|---------------------------------|---------------------------------|---------------------------------|---------------------------------|---------------------------------|----------------------------------|
|                         | VRC01                                                       | gVRC-H1 <sub>ac38</sub> /VRC01L | gVRC-H2 <sub>ac38</sub> /VRC01L | gVRC-H3 <sub>ac38</sub> /VRC01L | gVRC-H4 <sub>ac38</sub> /VRC01L | gVRC-H5 <sub>ac38</sub> /VRC01L | gVRC-H6 <sub>ac38</sub> /VRC01L | gVRC-H7 <sub>ac38</sub> /VRC01L | gVRC-H8 <sub>ac38</sub> /VRC01L | gVRC-H9 <sub>ac38</sub> /VRC01L | gVRC-H10 <sub>ac38</sub> /VRC01L |
| <b>Clade A (n=7)</b>    |                                                             |                                 |                                 |                                 |                                 |                                 |                                 |                                 |                                 |                                 |                                  |
| Q23.17                  | 0.046                                                       | 0.086                           | >50                             | 0.033                           | 0.082                           | 0.062                           | 0.052                           | 0.082                           | 0.107                           | 0.051                           | 0.041                            |
| Q842.d12                | 0.019                                                       | 0.031                           | 13.3                            | 0.016                           | 0.032                           | 0.028                           | 0.025                           | 0.046                           | 0.071                           | 0.025                           | 0.025                            |
| UG037.8                 | 0.082                                                       | 0.070                           | >50                             | 0.050                           | 0.085                           | 0.054                           | 0.052                           | 0.090                           | 0.175                           | 0.089                           | 0.088                            |
| Q168.a2                 | 0.129                                                       | 0.204                           | >50                             | 0.119                           | 0.426                           | 0.287                           | 0.128                           | 0.223                           | 0.453                           | 0.279                           | 0.450                            |
| KER2018.11              | 0.675                                                       | 1.2                             | >50                             | 0.491                           | 0.812                           | 0.692                           | 0.612                           | 0.490                           | 1.8                             | 1.1                             | 1.3                              |
| KER2008.12              | 1.0                                                         | 0.206                           | 4.6                             | 3.9                             | 8.7                             | 4.0                             | 5.9                             | 3.7                             | 3.5                             | 0.917                           | 1.3                              |
| <b>Clade B (n=7)</b>    |                                                             |                                 |                                 |                                 |                                 |                                 |                                 |                                 |                                 |                                 |                                  |
| Yu2                     | 0.091                                                       | 0.077                           | >50                             | 0.061                           | 0.168                           | 0.161                           | 0.087                           | 0.172                           | 0.294                           | 0.050                           | 0.063                            |
| JR-FL                   | 0.029                                                       | 0.026                           | >50                             | 0.007                           | 0.026                           | 0.020                           | 0.009                           | 0.015                           | 0.054                           | 0.006                           | 0.007                            |
| 7165.18                 | >50                                                         | >50                             | >50                             | 13.5                            | >50                             | 28.7                            | >50                             | >50                             | >50                             | 30.1                            | 24.0                             |
| BG1168.01               | 0.392                                                       | 1.2                             | >50                             | 0.126                           | 0.504                           | 0.195                           | >50                             | 2.4                             | 0.909                           | 0.456                           | 0.600                            |
| JR-CSF                  | 0.238                                                       | 0.044                           | >50                             | 0.066                           | 0.121                           | 0.097                           | 0.051                           | 0.042                           | 0.111                           | 0.040                           | 0.057                            |
| PVO.04                  | 0.435                                                       | 0.178                           | >50                             | 0.064                           | 0.488                           | 0.214                           | 0.073                           | 0.128                           | 0.294                           | 0.141                           | 0.277                            |
| TRO.11                  | 0.381                                                       | 0.177                           | >50                             | 0.043                           | 0.143                           | 0.075                           | 0.077                           | 0.158                           | 0.388                           | 0.225                           | 0.302                            |
| CAAN.A2                 | 1.3                                                         | 1.2                             | 10.0                            | 2.0                             | 6.4                             | 3.1                             | 1.9                             | 2.2                             | 4.6                             | 1.1                             | 1.5                              |
| <b>Clade C (n=6)</b>    |                                                             |                                 |                                 |                                 |                                 |                                 |                                 |                                 |                                 |                                 |                                  |
| DU156.12                | 0.109                                                       | 0.109                           | 3.3                             | 0.030                           | 0.214                           | 0.118                           | 0.129                           | 0.176                           | 0.238                           | 0.156                           | 0.158                            |
| ZM109.4                 | 0.102                                                       | 0.159                           | >50                             | 0.809                           | 4.73                            | 9.9                             | 0.520                           | 0.121                           | 0.102                           | 0.058                           | 0.053                            |
| ZM106.9                 | 0.268                                                       | 0.156                           | >50                             | 0.080                           | 0.443                           | 0.163                           | 0.250                           | 0.199                           | 0.478                           | 0.300                           | 0.309                            |
| ZM176.66                | 0.029                                                       | >50                             | >50                             | >50                             | >50                             | >50                             | >50                             | 0.048                           | 0.097                           | 0.031                           | 0.025                            |
| SO18.18                 | 0.058                                                       | 0.110                           | >50                             | 0.052                           | 0.279                           | 0.156                           | 0.072                           | 0.082                           | 0.250                           | 0.044                           | 0.074                            |
| TV1.29                  | >50                                                         | >50                             | >50                             | >50                             | >50                             | >50                             | >50                             | >50                             | >50                             | >50                             | >50                              |
| <b>Breadth (n = 20)</b> | 90%                                                         | 85%                             | 20%                             | 90%                             | 85%                             | 90%                             | 80%                             | 90%                             | 90%                             | 95%                             | 95%                              |
| <b>GMT<sup>c</sup></b>  | 0.151                                                       | 0.151                           | 6.7                             | 0.132                           | 0.338                           | 0.288                           | 0.137                           | 0.177                           | 0.314                           | 0.159                           | 0.187                            |
| MuLV <sup>d</sup>       | >50                                                         | >50                             | >50                             | >50                             | >50                             | >50                             | >50                             | >50                             | >50                             | >50                             | >50                              |

<sup>a</sup>The chimeric antibodies were expressed using the 10 heavy chains derived from donor C38 and the VRC01 light chain. The wild-type mAb VRC01 was included as a control.

<sup>b</sup>The IC<sub>50</sub> values < 1 µg/ml are highlighted in red; values 1 – 50 µg/ml are in green.

<sup>c</sup>GMT stands for geometric mean titer, which was calculated for neutralization sensitive viruses with an IC<sub>50</sub> value < 50 µg/ml.

<sup>d</sup>MuLV stands for murine leukemia virus, which was included as a negative control.

**Table S12. Neutralization values ( $\mu\text{g/ml}$ ) of antibody gVRC-H1<sub>dc38</sub>/VRC01L against 153 HIV-1 Env-pseudoviruses.**

| Virus        | Clade | IC <sub>50</sub> | IC <sub>80</sub> | Virus        | Clade | IC <sub>50</sub> | IC <sub>80</sub> | Virus          | Clade | IC <sub>50</sub> | IC <sub>80</sub> |
|--------------|-------|------------------|------------------|--------------|-------|------------------|------------------|----------------|-------|------------------|------------------|
| 0260.v5.c36  | A     | 1.440            | 4.75             | 3988.25      | B     | >50              | >50              | 25925-2.22     | C     | 0.821            | 2.84             |
| 0330.v4.c3   | A     | 0.151            | 0.715            | 5768.04      | B     | 1.51             | 6.57             | 26191-2.48     | C     | 0.400            | 1.53             |
| 0439.v5.c1   | A     | 0.781            | 2.89             | 6101.10      | B     | 0.211            | 1.1              | 3637_V5_C3     | C     | 10.9             | >50              |
| 3365.v2.c20  | A     | 0.121            | 0.468            | 6535.3       | B     | 2.87             | 23.4             | 3873_V1_C24    | C     | >50              | >50              |
| 3415.v1.c1   | A     | 0.533            | 1.61             | 7165.18      | B     | >50              | >50              | 6322_V4_C1     | C     | >50              | >50              |
| 3718.v3.c11  | A     | 8.570            | >50              | 89.6.DG      | B     | 0.458            | 1.64             | 6471_V1_C16    | C     | >50              | >50              |
| 398-F1_F6_20 | A     | 0.616            | 2.42             | AC10.29      | B     | 2.02             | 8.12             | 6631_V3_C10    | C     | >50              | >50              |
| BB201.B42    | A     | 0.832            | 3.36             | ADA          | B     | 0.870            | 3.05             | 6644_V2_C33    | C     | 0.378            | 2.08             |
| BB539.2B13   | A     | 15.3             | >50              | BaL.01       | B     | 0.129            | 0.483            | BR025.9        | C     | >50              | >50              |
| B1369.9A     | A     | 0.199            | 0.961            | BG1168.01    | B     | 7.36             | >50              | CAP210.E8      | C     | >50              | >50              |
| BS208.B1     | A     | 0.037            | 0.204            | BL01.DG      | B     | >50              | >50              | CAP244.D3      | C     | 0.622            | 3.14             |
| KER2008.12   | A     | 0.957            | 3.31             | BR07.DG      | B     | 1.82             | 7.63             | CAP45.G3       | C     | 7.63             | >50              |
| KER2018.11   | A     | 3.550            | 16.2             | CAAN.A2      | B     | 4.35             | 13.7             | CNE30          | C     | 2.35             | 7.69             |
| KNH1209.18   | A     | 0.382            | 1.12             | HO86.8       | B     | >50              | >50              | CNE53          | C     | 0.198            | 0.812            |
| MB201.A1     | A     | 0.510            | 2.25             | HT593.1      | B     | 1.10             | 3.94             | DU123.06       | C     | >50              | >50              |
| MB539.2B7    | A     | 1.020            | 3.55             | HXB2         | B     | 0.099            | 0.429            | DU151.02       | C     | 0.934            | 5.03             |
| MI369.A5     | A     | 0.208            | 0.971            | JR-CSF       | B     | 0.320            | 1.57             | DU156.12       | C     | 0.249            | 1.08             |
| MS208.A1     | A     | 0.184            | 0.84             | JR-FL        | B     | 0.026            | 0.132            | DU172.17       | C     | >50              | >50              |
| Q168.a2      | A     | 0.378            | 1.29             | MN.3         | B     | 0.068            | >50              | DU422.01       | C     | >50              | >50              |
| Q23.17       | A     | 0.192            | 0.61             | PVO.04       | B     | 0.591            | 3.12             | MW965.26       | C     | 0.144            | 0.913            |
| Q259.17      | A     | 0.471            | 2.47             | QH0515.01    | B     | 0.726            | 5.44             | SO18.18        | C     | 0.274            | 1.09             |
| Q461.e2      | A     | 0.918            | 4.29             | QH0692.42    | B     | 3.27             | 11               | TV1.29         | C     | >50              | >50              |
| Q769.h5      | A     | 0.075            | 0.411            | REJO.67      | B     | 0.189            | 0.823            | TZA125.17      | C     | >50              | >50              |
| Q842.d12     | A     | 0.045            | 0.18             | RHPA.7       | B     | 0.098            | 0.568            | TZBD.02        | C     | 0.088            | 0.411            |
| QH209.14M.A2 | A     | 0.033            | 0.421            | SC422.8      | B     | 0.196            | 0.948            | ZA012.29       | C     | 0.422            | 1.7              |
| RW020.2      | A     | 0.359            | 1.46             | SF162.LS     | B     | 0.109            | 0.529            | ZM106.9        | C     | 0.371            | 1.16             |
| UG037.8      | A     | 0.226            | 0.715            | SS1196.01    | B     | 0.269            | 1.08             | ZM109.4        | C     | 0.361            | 2.59             |
| 620345.c1    | AE    | >50              | >50              | THRO.18      | B     | 18.3             | >50              | ZM135.10a      | C     | 0.598            | 2.71             |
| C1080.c3     | AE    | 1.250            | 14.3             | TRJO.58      | B     | 0.370            | 1.26             | ZM176.66       | C     | >50              | >50              |
| C2101.c1     | AE    | 0.335            | 1.4              | TRO.11       | B     | 0.710            | 2.07             | ZM197.7        | C     | 1.41             | 4.36             |
| C3347.c11    | AE    | 0.140            | 0.8              | WITO.33      | B     | 0.306            | 1.25             | ZM214.15       | C     | 3.16             | 13.6             |
| C4118.09     | AE    | 0.137            | 0.918            | Yu2          | B     | 0.121            | 0.783            | ZM215.8        | C     | 0.113            | 0.924            |
| CNE59        | AE    | 0.659            | 5.14             | CNE10        | B'    | 0.584            | 2.39             | ZM233.6        | C     | >50              | >50              |
| M02138       | AE    | 0.561            | 1.95             | CNE14        | B'    | 0.196            | 0.68             | ZM249.1        | C     | 0.349            | 1.54             |
| R1166.c1     | AE    | 0.612            | 2.1              | CNE4         | B'    | 0.461            | 3.39             | ZM53.12        | C     | 2.53             | 10.1             |
| R2184.c4     | AE    | 0.077            | 0.383            | CNE57        | B'    | 0.297            | 1.02             | ZM55.28a       | C     | 0.359            | 1.21             |
| R3265.c6     | AE    | 0.201            | 4.71             | CH038.12     | BC    | 39.0             | >50              | 231965.c1      | D     | 0.840            | 4.68             |
| TH966.8      | AE    | 0.629            | 2.42             | CH070.1      | BC    | >50              | >50              | 247-23         | D     | >50              | >50              |
| TH976.17     | AE    | 0.271            | 1.39             | CH117.4      | BC    | 0.124            | 9.16             | 3016.v5.c45    | D     | >50              | >50              |
| 235-47       | AG    | 0.102            | 0.499            | CH181.12     | BC    | 0.447            | 1.67             | 57128.vrc15    | D     | >50              | >50              |
| 242-14       | AG    | >50              | >50              | CNE40        | B'C   | 0.333            | 1.84             | 6405.v4.c34    | D     | 1.80             | 5                |
| T250-4       | AG    | >50              | >50              | 286.36       | C     | 1.21             | 4.72             | A03349M1.vrc4a | D     | 6.73             | 36.2             |
| T251-18      | AG    | 2.31             | 8.49             | 288.38       | C     | 0.224            | 2.66             | NKU3006.ec1    | D     | 0.930            | 3.22             |
| T255-34      | AG    | 1.35             | 15.6             | 0013095-2.11 | C     | 1.270            | 10.2             | UG021.16       | D     | 0.807            | 5.94             |
| T257-31      | AG    | 4.96             | 14.9             | 001428-2.42  | C     | 0.046            | 0.175            | UG024.2        | D     | 12.7             | >50              |
| 263-8        | AG    | 0.396            | 1.33             | 0077_V1_C16  | C     | >50              | >50              | X2088_c9       | G     | >50              | >50              |
| T266-60      | AG    | 0.430            | 1.63             | 16055-2.3    | C     | 0.327            | 1.03             | 6540.v4.c1     | AC    | >50              | >50              |
| 271-11       | AG    | 1.350            | >50              | 16845-2.22   | C     | 9.75             | >50              | 6545.v3.c13    | AC    | >50              | >50              |
| T278-50      | AG    | >50              | >50              | 16936-2.21   | C     | 0.220            | 1.1              | 6095_V1_C10    | ACD   | 1.51             | 8.12             |
| 928-28       | AG    | 2.46             | 7.8              | 25710-2.43   | C     | 0.513            | 2.13             | 3337_V2_C6     | CD    | 0.205            | 10.6             |
| DJ263.8      | AG    | 1.15             | 12.7             | 25711-2.4    | C     | 1.71             | 6.69             | 3817.v2.c59    | CD    | 15.7             | >50              |

**Table S13. Sequence identity of neutralizing heavy chains and light chains identified from 454 pyrosequencing data of donor C38 to the corresponding chains of 13 template VRC01-like antibodies.<sup>a</sup>**

1. Heavy chain sequence identity

| HC code <sup>b</sup> | VRC01     | VRC02     | VRC03     | NIH45-46  | VRC-PG04  | VRC-PG04b | VRC-CH31  | VRC-CH32  | VRC-CH33  | 3BNC60    | 3BNC117   | 12A12     | 12A21     |
|----------------------|-----------|-----------|-----------|-----------|-----------|-----------|-----------|-----------|-----------|-----------|-----------|-----------|-----------|
| H1                   | 62.8/57.0 | 63.9/57.9 | 62.1/50.8 | 61.9/53.6 | 65.1/55.2 | 65.3/56.0 | 59.0/48.9 | 58.8/49.6 | 59.3/45.0 | 62.6/52.8 | 63.1/52.8 | 66.4/55.7 | 66.7/56.6 |
| H2                   | 62.5/45.5 | 62.5/45.5 | 59.7/42.3 | 61.6/44.8 | 62.1/49.6 | 62.4/50.4 | 60.1/42.7 | 57.5/42.7 | 57.3/42.0 | 59.3/46.3 | 60.2/48.0 | 64.2/55.7 | 64.5/56.6 |
| H3                   | 59.5/48.8 | 59.5/50.4 | 59.5/42.3 | 59.5/47.2 | 58.4/48.8 | 58.7/48.0 | 61.1/38.9 | 59.5/38.2 | 59.3/40.5 | 57.5/47.2 | 60.7/48.0 | 64.2/54.9 | 65.0/56.6 |
| H4                   | 61.2/51.2 | 60.6/52.1 | 59.2/44.6 | 59.5/48.0 | 58.9/50.4 | 59.2/49.6 | 60.8/39.7 | 60.3/38.9 | 59.3/41.2 | 59.3/47.2 | 59.9/48.0 | 65.8/54.9 | 64.8/55.7 |
| H5                   | 61.4/49.6 | 60.9/50.4 | 59.7/44.6 | 58.4/45.6 | 58.1/48.8 | 59.5/48.0 | 59.5/38.9 | 58.0/38.2 | 57.3/40.5 | 58.3/47.2 | 59.9/46.3 | 65.0/52.5 | 64.5/54.9 |
| H6                   | 61.7/52.1 | 62.8/54.5 | 62.1/49.2 | 61.1/52.0 | 64.5/56.0 | 64.8/57.6 | 59.5/48.9 | 59.8/49.6 | 60.6/46.6 | 62.3/56.1 | 61.8/56.1 | 64.8/54.1 | 64.8/57.4 |
| H7                   | 62.8/58.7 | 62.3/59.5 | 62.3/50.0 | 61.1/54.4 | 65.3/53.6 | 65.1/54.4 | 58.3/51.1 | 58.8/51.1 | 59.0/47.3 | 63.1/56.1 | 63.1/56.9 | 68.3/58.2 | 68.3/59.0 |
| H8                   | 63.9/58.7 | 62.5/57.0 | 56.7/50.0 | 61.9/57.6 | 63.5/55.2 | 64.3/54.4 | 59.8/44.3 | 59.0/45.0 | 60.6/48.1 | 61.8/58.5 | 63.7/58.5 | 68.9/66.4 | 68.6/63.9 |
| H9                   | 64.2/53.7 | 64.2/54.5 | 61.3/50.0 | 63.5/53.6 | 65.9/56.0 | 66.1/56.8 | 63.9/47.3 | 62.3/48.9 | 63.1/48.9 | 64.5/59.3 | 66.7/57.7 | 69.4/64.8 | 71.3/63.9 |
| H10                  | 64.2/54.5 | 64.2/55.4 | 60.8/49.2 | 63.5/54.4 | 65.3/55.2 | 65.6/56.0 | 63.6/48.1 | 62.1/49.6 | 63.1/49.6 | 64.2/58.5 | 66.4/56.9 | 68.9/63.9 | 71.6/64.8 |

2. Light chain sequence identity

| LC code <sup>b</sup> | VRC01     | VRC02     | VRC03     | NIH45-46  | VRC-PG04  | VRC-PG04b | VRC-CH31  | VRC-CH32  | VRC-CH33  | 3BNC60    | 3BNC117   | 12A12     | 12A21     |
|----------------------|-----------|-----------|-----------|-----------|-----------|-----------|-----------|-----------|-----------|-----------|-----------|-----------|-----------|
| L1                   | 72.9/58.4 | 72.3/57.4 | 72.9/56.9 | 71.9/59.4 | 70.9/55.9 | 71.9/55.4 | 59.2/44.7 | 59.5/44.7 | 59.9/44.7 | 61.6/45.5 | 61.6/46.5 | 60.8/47.6 | 58.6/42.7 |
| L2                   | 75.9/64.4 | 74.6/63.4 | 74.5/63.7 | 76.2/67.3 | 73.5/66.7 | 74.9/67.3 | 64.4/50.5 | 64.7/48.5 | 65.4/50.5 | 63.3/46.5 | 65.0/47.5 | 63.8/53.4 | 62.8/50.5 |
| L3                   | 74.3/64.4 | 72.9/63.4 | 73.2/64.7 | 72.6/63.4 | 70.9/56.9 | 71.9/56.4 | 58.9/43.7 | 58.9/43.7 | 57.9/43.7 | 61.3/44.4 | 61.3/45.5 | 64.1/52.4 | 59.9/45.6 |
| L4                   | 72.6/52.5 | 71.6/50.5 | 69.9/54.9 | 72.6/52.5 | 70.3/51.0 | 71.6/50.5 | 62.1/48.5 | 62.5/48.5 | 61.8/47.6 | 63.3/45.5 | 64.3/45.5 | 61.5/45.6 | 60.8/46.6 |
| L5                   | 69.6/56.4 | 69.0/55.4 | 70.3/58.8 | 69.0/56.4 | 65.4/49.0 | 66.3/48.5 | 68.0/56.3 | 66.3/56.3 | 66.7/56.3 | 66.7/56.6 | 67.0/57.6 | 71.5/67.0 | 67.6/59.2 |
| L6                   | 76.2/67.3 | 75.6/66.3 | 75.2/64.7 | 76.6/67.3 | 74.5/67.6 | 75.6/67.3 | 64.4/51.5 | 65.4/50.5 | 65.7/51.5 | 64.0/47.5 | 64.3/47.5 | 66.3/52.4 | 63.8/48.5 |

<sup>a</sup> Sequence identity was calculated at both nucleotide level and amino-acid level, and both values are shown for each pair of antibody chains, separated by "/".

<sup>b</sup> Chain code is abbreviation for the nomenclature of neutralizing antibody chains identified from 454 pyrosequencing data of donor C38, with Hn for gVRC-Hn<sub>dC38</sub> and Ln for gVRC-Ln<sub>dC38</sub>.
